1 **Intermediate Progenitor cells provide a transition between hematopoietic**  
2 **progenitors and their differentiated descendants**

3

4 **Carrie M. Spratford<sup>1,2</sup>, Lauren M. Goins<sup>1,2</sup>, Fangtao Chi<sup>1,2,4</sup>, Juliet R. Girard<sup>1,2</sup>, Savannah N.**  
5 **Macias<sup>1</sup>, Vivien W. Ho<sup>1</sup>, Utpal Banerjee<sup>1,2,3,4</sup>**

6

7 <sup>1</sup> Department of Molecular, Cell, and Developmental Biology, <sup>2</sup> Molecular Biology Institute, <sup>3</sup>  
8 Department of Biological Chemistry, and <sup>4</sup> Eli and Edythe Broad Center of Regenerative  
9 Medicine and Stem Cell Research, University of California, Los Angeles

10

11 Corresponding author: [banerjee@mbi.ucla.edu](mailto:banerjee@mbi.ucla.edu)

12

13 **Abstract**

14 Genetic and genomic analysis in *Drosophila* suggests that hematopoietic progenitors  
15 likely transition into terminal fates via intermediate progenitors (IPs) with some characteristics  
16 of either, but perhaps maintaining IP-specific markers. In the past, IPs have not been directly  
17 visualized and investigated due to lack of appropriate genetic tools. Here we report a split-*GAL4*  
18 construct, *CHIZ-GAL4*, that identifies IPs as cells physically juxtaposed between true progenitors  
19 and differentiating hemocytes. IPs comprise a distinct cell type with a unique cell-cycle profile  
20 and they remain multipotent for all blood cell fates. Additionally, through their dynamic control  
21 of the Notch ligand, Serrate, IPs specify the fate of direct neighbors. The Ras pathway controls  
22 the number of IP cells and promotes their transition into differentiating cells. The split-*GAL4*  
23 strategy is amenable for adoption in mammalian systems and would be invaluable in assigning  
24 trajectories that stem and progenitor populations follow as they develop into mature blood  
25 cells.

26

## 27 **Introduction**

28           The transition from a multipotent progenitor into various types of mature, functional  
29 cells is a widely studied process in both *Drosophila* and vertebrates. Foundational studies  
30 investigating human hematopoiesis revealed the ability of a multipotent hematopoietic stem  
31 cell to differentiate into multiple distinct blood cell types (reviewed in: Dzierzak and Speck,  
32 2008; Weissman and Shizuru, 2008). The stem/progenitor and differentiated cell populations  
33 are identified and further characterized by expression of unique markers (Coffman and  
34 Weissman, 1981; Ikuta and Weissman, 1992; Morrison and Weissman, 1994; Muller-Sieburg et  
35 al., 1986; Smith et al., 1991; Uchida and Weissman, 1992). However, the intermediary stage  
36 between a stem cell and a differentiated cell is often not well-studied due to a lack of  
37 developed tools to target this particular population. *Drosophila* provides an ideal model system  
38 with a variety of powerful molecular genetic tools available with which to test and define the  
39 function of these intermediate-state cells during the process of hematopoiesis.

40

41           Blood cells in *Drosophila* are functionally akin to those derived from mammalian  
42 myeloid lineages (reviewed in Evans et al., 2003). As in all invertebrates, *Drosophila* lack  
43 lymphoid cells that enable adaptive immunity in vertebrates. The *Drosophila* lymph gland (LG)  
44 is the primary site of hematopoiesis during larval development and is made up of multiple  
45 paired lobes flanking the dorsal vessel, which functions as the heart (Jung et al., 2005; Mandal  
46 et al., 2004). The lymph gland lobes disintegrate during pupariation and the dispersed mature  
47 blood cells contribute to the hematopoietic repertoire of the pupa and the adult (Dey et al.,  
48 2016; Grigorian et al., 2011).

49           The anteriorly located lobes are the largest and are referred to as primary lobes that  
50 follow a stereotypic pattern of differentiation. Several zones consisting of distinct cell  
51 populations have been identified in the primary lobe. The medially located Medullary Zone  
52 (MZ) is composed of blood progenitors while the Cortical Zone (CZ) houses three types of  
53 mature blood cells (Jung et al., 2005). When present, a cell population termed the Posterior  
54 Signaling Center (PSC) functions as a niche and produces a variety of secreted signaling ligands  
55 that promote progenitor maintenance (Benmimoun et al., 2015; Lebestky et al., 2003; Mandal  
56 et al., 2007; Mondal et al., 2011; Oyallon et al., 2016). The cells of the PSC are defined by their  
57 expression of the homeotic gene *Antennapedia* (*Antp*) (Mandal et al., 2007).

58

59           During first and early second instars, the small primary lobes consist of progenitors that  
60 express *domeless* (*dome*) (Jung et al., 2005; Krzemien et al., 2007; Mondal et al., 2011).  
61 Hemocyte differentiation initiates at mid-second instar and is marked by *Hemolectin* (*Hml*) and  
62 Peroxidase (*Pxn*) expression in the developing blood cells (Irving et al., 2005; Jung et al., 2005;  
63 Sinenko et al., 2009; Stofanko et al., 2008). Later in the second and third instar larvae, the  
64 number of differentiated cells expands forming a distinct CZ. The progenitors populate the MZ  
65 and continue to express *dome*. The three mature blood cell types: plasmatocytes, crystal cells,  
66 and lamellocytes occupy the CZ (Evans et al., 2009; Jung et al., 2005; Krzemien et al., 2010;  
67 Minakhina and Steward, 2010). Mature plasmatocytes are positively identified by the presence  
68 of the P1 antigen encoded by the *Nimrod C1* (*NimC1*) gene (Kurucz et al., 2007). Crystal cells  
69 express Lozenge (*Lz*), Hindsight (*Hnt*), and Pro-phenoloxidase (PPO) proteins (Jung et al., 2005;  
70 Lebestky et al., 2000; Lebestky et al., 2003; Neyen et al., 2015; Terriente-Felix et al., 2013).



71 Lamellocytes are rarely observed in the lymph gland, but when present they are marked by the  
72 L1 antigen encoded by *Atilia* (Honti et al., 2009; Lanot et al., 2001; Markus et al., 2005; Markus  
73 et al., 2009; Sorrentino et al., 2002).

74

75 A small number of cells residing at the juxtaposition of the MZ and CZ express both  
76 *dome* and Pxn but lack mature hemocyte markers, P1 and Lz (Krzemien et al., 2010; Sinenko et  
77 al., 2009). This observation suggests a role for these cells in the process of transition from a  
78 progenitor to a differentiated fate. Collectively, these cells are referred to as Intermediate  
79 Progenitors (IPs) belonging to an Intermediate Zone (IZ) (Krzemien et al., 2010; Oyallon et al.,  
80 2016). However, thus far no reporter, enhancer, antibody, or driver exists to specifically identify  
81 or genetically alter the intermediate progenitors. For this reason, molecular pathways that  
82 regulate maturation of these transitional cells remain unknown. Here we describe the  
83 development of a “split-*GAL4*” driver that targets IPs and allows us to monitor and investigate  
84 this unique set of transitioning cells. We demonstrate that the IPs are a distinct population of  
85 cells that can be increased or reduced in number through genetic manipulation. These cells are  
86 multipotent and contribute to all three differentiated blood cell types. These IZ cells have a  
87 distinct mitotic and gene expression profile compared to cells of the MZ and CZ.

88

## 89 Results

90

### 91 Characterization of the Intermediate Zone cell population of IPs

92 Using a combination of direct drivers of *domeless* (*dome*<sup>MESO</sup>-GFP) and *Hemolectin* (*Hml*<sup>Δ</sup>-  
93 *DsRed*), the IZ cells are seen as an overlapping population at the site of juxtaposition between  
94 the MZ and CZ (Figure 1A). In an effort to positively label and manipulate genetic pathways  
95 within these intermediate progenitors, we designed a “split-GAL4” driver to target the cells  
96 with overlapping expression of *dome*<sup>MESO</sup>-GFP and *Hml*<sup>Δ</sup>-*DsRed* (Figure 1B). In these constructs,  
97 the *dome*<sup>MESO</sup> enhancer is fused to the p65 activation domain and the *Hml*<sup>Δ</sup> enhancer is used to  
98 drive the GAL4 DNA binding domain such that only cells that simultaneously express *dome* and  
99 *Hml* drive transgene expression downstream of *UAS* binding sites. For reasons of brevity, we  
100 refer to this driver as *CHIZ-GAL4* (Combined Hematopoietic Intermediate Zone-GAL4). *CHIZ-*  
101 *GAL4* is the first identified positive marker for the intermediate zone that reliably labels cells in  
102 transition from a progenitor to a mature hemocyte. In this paper we use the terms  
103 “Intermediate Progenitors (IPs)”, “intermediate zone (IZ) cells”, and “*CHIZ* cells”  
104 interchangeably.

105

106 *CHIZ-GAL4* efficiently marks the IPs when used in conjunction with a short-lived fluorophore  
107 such as membrane-GFP (mGFP; Figure 1C), *Fly-FUCCI* (Figure 1--figure supplement 1A) or a  
108 rapidly degrading form of GFP (*dsGFP*; Li et al., 1998; Wang et al., 2012) (Figure 1I). In a lymph  
109 gland fluorescently marked for MZ and CZ cells, *CHIZ>mGFP* (*CHIZ-GAL4; UAS-mGFP*) faithfully  
110 labels cells that express both *dome* and *Hml* and lie at the juxtaposition of the MZ and CZ  
111 (Figure 1C-E). Imaging and flow cytometry data show that the IZ comprises 11% (+/- 4.7%,

112 n=115 lymph glands) of total cells in the primary lobes of wandering third instar lymph glands.  
113 Long-lived fluorophores such as eGFP are not useful to specifically visualize the transitioning IZ  
114 population due to their extended perdurance when driven by *CHIZ-GAL4* (Figure 1—figure  
115 supplement 1C).

116

117 *CHIZ>mGFP* expression initiates in a small number of cells at the periphery of the lymph  
118 gland at mid-second instar (Figure 1F). This timing is also coincident with the onset of  
119 differentiation. As larval development progresses into the late second and early third instars,  
120 IPs increase in number and intensity to form a band of cells in the middle of the LG (Figure 1G).  
121 At the wandering third instar, IPs appear scattered throughout the LG and are notably present  
122 in more medial regions compared to earlier stages of development (Figure 1H). E-cadherin (E-  
123 cad), which is required for proper progenitor maintenance is prominently expressed in the MZ  
124 cells (Gao et al., 2013; Gao et al., 2014; Jung et al., 2005) but its expression ceases immediately  
125 prior to the initiation of *CHIZ-GAL4* (Figure 1J, K). These data are consistent with our recent  
126 transcriptomic analysis of the lymph gland that suggests lack of E-Cad expression as a  
127 characteristic feature of the IZ and that has also identified several gene products that are  
128 uniquely representative of the IP population (see accompanying paper; Girard et al., 2020).  
129

130 We next characterized the cell cycle profile of these transitory cells using the *Fly FUCCI*  
131 system (*Fluorescent Ubiquitination Cell Cycle Indicator*) (Zielke et al., 2011). We find that a small  
132 percentage of *CHIZ* cells are in G1, while the vast majority is in S and G2 (Figure 1L), a result that  
133 is also confirmed by flow cytometric analysis (Figure 1—figure supplement 1A, B). As the *Fly*

134 *FUCCI* system is unable to distinguish between G2 and early mitotic phases, we sought to  
135 measure the occurrence of *CHIZ* cells undergoing mitosis. Surprisingly, *CHIZ* cells are never  
136 found to co-localize with phosphorylated Histone H3 (pH3) (Figure 1M, N). Thus, IZ cells can be  
137 in every phase of the cell cycle except mitosis. To confirm this unexpected result, we utilized  
138 loss of function genotypes in the mitosis-promoting kinase Aurora B (AurB). Loss of this protein  
139 is expected to prevent condensation and coupling of chromosomes during mitosis leading to  
140 large nuclei with replicated chromosomes (Adams et al., 2001; Giet and Glover, 2001). As  
141 expected, expression of *AuroraB-RNAi* in the MZ results in small lymph glands with large nuclei  
142 (Figure 1—figure supplement 1D, E). In contrast, *AuroraB-RNAi* expressed in the IPs does not  
143 give rise to an observable phenotype (Figure 1—figure supplement 1F, G). We conclude that a  
144 mitotic population enters the IZ following cell division but is maintained in a pre-mitotic state  
145 until it exits the IZ.

146

#### 147 **IPs contribute to all mature hemocyte populations**

148 Under normal conditions, *CHIZ* cells do not express P1 or Hnt (Figure 2A, B), which are  
149 markers for mature plasmacytes and crystal cells, respectively (Kurucz et al., 2003; Terriente-  
150 Felix et al., 2013). The IZ cells can be largely eliminated by expression of the pro-apoptotic  
151 genes *hid* (*head involution defective*) and *rpr* (*reaper*) (Grether et al., 1995; White et al., 1994)  
152 driven by *CHIZ-GAL4*. In this genetic background, the CZ population is greatly reduced (Figure  
153 2C-E) as are the individual numbers of P1+ plasmacytes and Hnt+ crystal cells (Figure 2F-K).  
154 This provides an early indication that the IPs lead to the formation of plasmacytes and crystal  
155 cells. We confirmed this suggestion using iTRACE and G-TRACE lineage tracking constructs

156 (Bosch et al., 2016; Evans et al., 2009) to determine the possible developmental fates of *CHIZ*  
157 cells. We find that descendants of *CHIZ* cells are capable of committing to either plasmatocyte  
158 or to crystal cell fates (Figure 2L, M). Lamellocytes are not observed under normal conditions,  
159 but are induced upon larval injury (Crozatier et al., 2004; Markus et al., 2005; Rizki and Rizki,  
160 1991; Rizki and Rizki, 1992). Post-injury lineage tracing experiments show that IPs can also be  
161 fated to become lamellocytes (Figure 2N). Taken together, the antibody staining, lineage  
162 tracing, and ablation data show that the IZ cells constitute a transitional population of  
163 multipotent progenitors that are capable of contributing to the CZ populations of  
164 plasmatocytes, crystal cells, and lamellocytes.

165

#### 166 **Ras/Raf activity facilitates the IP to hemocyte transition**

167 We next investigated the function of known molecular pathways in the transition  
168 between IP and maturing hemocytes. Two major signaling pathways, Ras/Raf and Notch  
169 operate during lymph gland development (Crozatier et al., 2004; Dragojlovic-Munther and  
170 Martinez-Agosto, 2013; Krzemien et al., 2007; Mondal et al., 2011; Mondal et al., 2014;  
171 Mukherjee et al., 2011) but any specific role they might play in the IZ population has not been  
172 explored. Later we discuss the role of the Notch pathway in the IPs. Activation of the  
173 Ras/Raf/MAPK pathway in *Drosophila* leads to the phosphorylation of Pointed (Pnt) and Yan  
174 (Aop), both ETS family proteins that function as downstream transcriptional activator and  
175 repressor, respectively (Brunner et al., 1994; Lai and Rubin, 1992; Nusslein-Volhard et al., 1984;  
176 O'Neill et al., 1994). Activated forms of Ras or Raf expressed specifically in the IPs causes a  
177 reduction in the number of the IPs (Figure 3A-C, F) and reciprocally, inhibition of the Ras

178 pathway increases the IZ population (Figure 3D-F). Concomitantly, we observe an increase in  
179 the number of *Hm/+* cells upon activation of the Ras/Raf pathway and a decrease in this  
180 population upon loss of function of this pathway (Figure 3G-L). The loss of function phenotype  
181 is strikingly apparent when *pnt* expression is knocked down in the *CHIZ* cells (Figure 3J) or when  
182 a constitutively active version of *yan* (*Yan<sup>ACT</sup>*) (Rebay and Rubin, 1995), expected to block Ras  
183 pathway signals, is expressed in the IPs (Figure 3K). This latter result is not phenocopied if the  
184 over-expressed version of Yan is wild type (*Yan<sup>WT</sup>*, not constitutively activated) (Figure 3L). The  
185 phenotypic distinction between *Yan<sup>ACT</sup>* and *Yan<sup>WT</sup>* overexpression further supports the presence  
186 of an activated Ras pathway that will cause degradation of the wild-type but not the activated  
187 version of Yan. Immunohistochemical localization shows no detectable Yan protein in the IPs  
188 (Figure 3M-N), contrary to a previous report, likely due to lack of direct IP markers (Tokusumi et  
189 al., 2011). Instead, the Yan protein is detected in crystal cells and *yan-RNAi* expressed in crystal  
190 cells eliminates all Yan expression in the lymph gland (Figure 3O and Figure 3--figure  
191 supplement 1A-C'). These data characterizing Yan expression are supported by RNAseq results  
192 showing high Yan transcript in the crystal cells (Girard et al., 2020). Finally, a subset of *CHIZ* cells  
193 express the nuclear form of dp-ERK (active MAPK), but we note that dp-ERK is additionally  
194 observed sporadically throughout the lymph gland (Figure 3P-Q). Altogether, these results  
195 suggest that cells of the IZ require Ras/Raf signaling to exit the *CHIZ* state and that in the  
196 absence of such a signal, the IP cells are held back in their transitional *CHIZ* state.

197

198

199

## 200 **IP cells induce crystal cell formation mediated by the Notch pathway**

201 *CHIZ* cells appear at 72 hours after egg lay (hAEL) before the appearance of the first  
202 crystal cells (Figure 4A-B). At 96hAEL, a significant number of crystal cells are detected in the  
203 immediate vicinity of the *CHIZ* cells with the two cell types separating from each other by  
204 108hAEL (Figure 4A, C-D). This suggests that the close temporal and spatial relationship  
205 between these two cell types during early stages of hemocyte differentiation becomes less  
206 important as development proceeds to the third instar. Serrate/Notch signaling is important for  
207 crystal cell specification in the lymph gland (Mukherjee et al., 2011; Terriente-Felix et al., 2013),  
208 therefore we investigated the Notch pathway in the context of IP function. Staining with an  
209 antibody raised against the intracellular domain of Notch (Notch<sup>ICD</sup>) shows expression at a low  
210 level throughout the lymph gland, with the highest level of staining seen in cells positioned  
211 adjacent to *CHIZ* cells (Figure 4E). Interestingly, in the mid-second instar, virtually all of the  
212 earliest appearing *CHIZ* cells express high levels of Serrate (Ser). This co-localization of IPs and  
213 Ser continues through mid-third instar, although non-overlapping expression is now evident in  
214 a fraction of the cells (Figure 4F-G). Importantly, however, knock-down of *Ser* specifically in  
215 *CHIZ* cells eliminates Ser protein expression in all cells of the lymph gland (Figure 4H, I). This  
216 indicates that all Ser-expressing cells in the lymph gland transition through a *CHIZ*-state at some  
217 point in their development and the dynamic pattern of Ser is a reflection of the tight temporal  
218 control of its expression. Furthermore, *Ser-RNAi* expressed in *CHIZ* cells causes a significant  
219 reduction in the number of crystal cells (Figure 4J). The high Serrate expression is greatly  
220 attenuated as the larva matures to the wandering third instar, and at this later stage, there is  
221 no correspondence between the residual low Ser-expressing cells and the large number of *CHIZ*

222 cells (Figure 4—figure supplement 1A-A'). RNAseq analysis confirms a high level of Ser  
223 expression in IZ cells compared to MZ cells (Girard et al., 2020). We conclude that the IP-specific  
224 expression of Ser is dynamic and is responsible for a subset of CZ cells to take on a crystal cell  
225 fate.

226

## 227 **Discussion**

228 Current tools of genome-wide analyses have revealed increased complexities within cell  
229 populations that were erstwhile considered homogeneous (Cho et al., 2020; Hernandez et al.,  
230 2018; Papalexi and Satija, 2018; Villani et al., 2017; Zeng et al., 2018). Readily available methods  
231 for visualization and characterization of cells with such fine distinctions in fate have been more  
232 difficult to come by. In this manuscript we used the split-*GAL4* strategy to generate *CHIZ-GAL4*  
233 in order to define and describe IPs. Additionally, *CHIZ-GAL4* allows for genetic manipulation of  
234 this transitory population that bridges MZ progenitors with the CZ hemocytes. The IPs of the  
235 intermediate zone represent a distinct cell type that have some characteristics that are distinct  
236 from and others that are similar to the cells of the MZ and CZ. For example, IPs express *dome*,  
237 but not E-cadherin, both of which are MZ markers. Similarly, IPs express *Hml*, but not the  
238 maturity markers P1 (plasmacytes) and Hnt (crystal cells). Importantly, we believe IPs to be a  
239 unique cell type as their numbers can be expanded or reduced upon genetic manipulation, as  
240 shown for example, with modulation of the Ras pathway. Additionally, bulk and single cell RNA-  
241 seq data obtained recently in the laboratory identifies several genes that are highly enriched  
242 within IPs when compared to their expression in all other cell types in the lymph gland (Girard



243 et al., 2020). In future studies, these will serve well as specific IZ markers and provide further  
244 functional relevance for this population.

245 An important, and perhaps surprising finding of this study is that the IPs are the only cell  
246 type in the lymph gland that are found to be in G1, S, and G2 phases of the cell cycle but not M.  
247 Several lines of evidence including RNAseq data (Girard et al., 2020) support this conclusion.  
248 The MZ cells are also fairly quiescent (Jung et al., 2005; Krzemien et al., 2010; Lebestky et al.,  
249 2003), but they are largely held in G2 (Sharma et al., 2019 and L.M.G., J.R.G, and C.M.S.  
250 unpublished data), and will undergo mitosis in a limited number of cells. Given that IPs are not  
251 restricted to G2, we propose that before entering the IP state, a *dome*<sup>+</sup> progenitor is released  
252 from G2 and it undergoes mitosis. Subsequently *Hml* is initiated and continues to be expressed  
253 as IPs progress through G1, S, and G2. At this point *dome* expression ceases, thus ending the  
254 *CHIZ*-state. The *dome*-negative post-*CHIZ* cell likely undergoes a round of mitosis before it  
255 progresses to a differentiated state. The IPs are multipotent and contribute to all of the three  
256 mature hemocyte populations. Trajectory analysis based on RNA-sequencing is supportive of  
257 the above conclusions (Girard et al., 2020). We should note that the data presented in this  
258 study do not preclude the possibility that a few of the hemocytes might form by a parallel  
259 mechanism that does not involve the IPs.

260

261 As in many developmental systems, entry into a proliferative state and fate determination  
262 are intimately intertwined and this applies as well to the transition from the IZ to the CZ. We  
263 presume that a mitotic event must closely follow exit from the IP state and is linked to  
264 differentiation into a hemocyte. We also know that the Ras/Raf pathway is required for exit out

265 of the IP state. In other systems, Ras/Raf activity has largely been associated with proliferation  
266 (reviewed in: Bryant et al., 2014; Karnoub and Weinberg, 2008; Lu et al., 2016), but in  
267 *Drosophila*, this pathway often governs cell fate determination, as seen for example, during the  
268 development of the eye imaginal disc (Flores et al., 2000; Freeman, 1996; Nagaraj and  
269 Banerjee, 2007; Simon et al., 1991). Thus, it remains uncertain at the present moment whether  
270 Ras/Raf initiates the mitotic process and this allows differentiation signals to be sensed to turn  
271 on markers, or if another mechanism controls the entry into mitosis and Ras is responsible for  
272 turning off a marker such as *dome*. In a manner similar to that seen in other well-defined  
273 developmental situations in *Drosophila*, the Ras/Raf and Notch pathways play dueling roles in  
274 the post-*CHIZ* stage of defining cell fate. The IPs express Serrate in a dynamic pattern and  
275 induce neighbors to take on a crystal cell fate. The expression of Serrate is downregulated by  
276 the mid-third instar, and its restricted spatial and temporal pattern of expression limits crystal  
277 cell number. Crystal cells do not have active Ras signaling as established by their expression of  
278 the Yan protein. The Ras/Raf signal leads to a plasmatocyte fate, the default pathway seen in  
279 the absence of Notch signaling. Upstream events that activate Ras in the IPs will be of great  
280 interest for future investigation. It is possible that a canonical ligand-dependent RTK may be  
281 involved, however other autonomous molecular inputs could feed into Ras. For example, genes  
282 involved in sphingolipid and ceramide signaling are enriched within IPs and are excellent  
283 candidates for a Ras-induced metabolic transition of the IPs (Girard et al., 2020).

284

285 While this work successfully identifies and manipulates the IPs, the question of why an  
286 intermediate state of cells exists still remains. These transitional cells may provide an

287 opportunity for synchronization of cell determination when producing mature hemocytes of  
288 different fates such that during normal development, plasmatocytes and crystal cells are  
289 created in a stereotypical ratio (Ghosh et al., 2015; Lebestky et al., 2000; Leitao and Sucena,  
290 2015; Tepass et al., 1994). It is also possible that these IPs have unique signaling functions as  
291 inferred from their regulation of Serrate expression to induce direct neighbors to take on a  
292 crystal cell fate. It is interesting to note that this class of cells can act autonomously as  
293 multipotent progenitors while also being non-autonomous inducers of one of the specific blood  
294 cell fates. Investigation into the expression of receptors and ligands in IPs will expand our  
295 current understanding of the role these cells play in regulating these ratios. We speculate that if  
296 proven to function in a similar dual role in other systems, that this presents a mechanism for IPs  
297 to maintain a strict balance between the number of true progenitors and each of the  
298 determined cell types that they produce.

299

300       Additionally, the IP population could exist as a mechanism to regulate the number of cells  
301 capable of producing mature hemocytes from the progenitor pool. If all progenitors in the MZ  
302 were to directly differentiate into mature hemocytes, a relatively steady pool of progenitors will  
303 be difficult to preserve, and the spatio-temporal order of hemocyte specification will not be  
304 maintained. The IP population provides a buffer zone that results after a round of mitosis, and a  
305 second round of mitosis follows immediately after exit from the *CHIZ* state. An important  
306 characteristic of the IP population is its lack of M-phase cells. The coordinated cell cycle within  
307 IPs will provide means for rapid immune response. In this context, the IPs could also provide a  
308 platform for rebalancing relative numbers of hemocyte types in response to environmental or

309 internally generated stresses such as nutritional, olfactory, redox stress, injury and immune  
310 challenge (Cho et al., 2018; Hao and Jin, 2017; Mukherjee et al., 2011; Owusu-Ansah and  
311 Banerjee, 2009; Pastor-Pareja et al., 2008; Rizki and Rizki, 1979; Rizki and Rizki, 1992; Shim et  
312 al., 2012; Shim et al., 2013; Small et al., 2014).

313

314         The experimental strategy used to develop *CHIZ-GAL4* has been successfully adapted for  
315 identifying cell types based on the co-expression of other genes in *Drosophila*, particularly in  
316 the nervous system (Jenett et al., 2012; Pfeiffer et al., 2008; Pfeiffer et al., 2010). There is  
317 nothing about this strategy that is *Drosophila*-specific and one hopes that its most useful  
318 application might be to uncover cryptic cell types in the context of the significantly more  
319 complex transitions described in mammalian development.

320 **Author contributions**

321 C.M.S., L.M.G., F.C., J.R.G., S.N.M., and V.W.H. performed experiments. C.M.S., L.M.G., J.R.G.,  
322 S.N.M., and V.W.H. analyzed data. C.M.S., L.M.G., and U.B. contributed to conceptualization of  
323 the project and writing the manuscript. U.B. supervised the project and provided funding.

324

325 **Acknowledgements**

326 We would like to thank the members of the Banerjee Lab for their comments and suggestions  
327 that improved this project. We thank Gerald Rubin, Nancy Fossett, Istvan Ando, Ken Irvine,  
328 Katja Brückner, and Brian McCabe for gifts of molecular constructs, antibodies, reagents,  
329 protocols, and *Drosophila* stocks that furthered this research. We thank the UCLA Broad Stem  
330 Cell Research Center (BSCRC), the BSCRC Flow Cytometry Core, the Department of Molecular,  
331 Cell, and Developmental Biology BSCRC Core Facilities in Microscopy, the UCLA *Drosophila*  
332 Media Facility, and the Eli and Edythe Broad Center of Regenerative Medicine and Stem Cell  
333 Research for providing equipment and services essential to this research. U.B. is supported by  
334 National Institutes of Health grants R01 HL-067395 and R01 CA-217608; C.M.S. by Ruth L.  
335 Kirschstein National Research Service Award number T32HL863458; L.M.G. by Ruth L.  
336 Kirschstein Institutional National Research Service Award number T32CA009056; F.C. by the  
337 China Scholarship Council Award and California Institute for Regenerative Medicine Pre-  
338 doctoral Fellowship; and J.R.G. by Ruth L. Kirschstein National Research Service Award number  
339 T32HL69766 and Institutional Research and Academic Career Development Award number  
340 K12GM106996.

341

342 **Competing Interests**

343 The authors declare no competing interests.

344

345 **Materials and Methods**

346 ***Drosophila* stocks and husbandry**

347 The following *Drosophila* stocks were utilized for this study: *w<sup>1118</sup>* (U. Banerjee), *Hml<sup>A</sup>-DsRed.nls*  
348 (Katja Brüeckner), *dome<sup>MESO</sup>-GFP.nls*, *Hml<sup>A</sup>-DsRed.nls/CyO* (U. Banerjee), *dome<sup>MESO</sup>-GAL4-AD*,  
349 *Hml<sup>A</sup>-GAL4-DBD* (a.k.a. *CHIZ-GAL4*, developed in Banerjee Lab for this paper, see below), *UAS-*  
350 *mGFP* (II) (U. Banerjee), *CHIZ-GAL4*, *UAS-mGFP* (U. Banerjee), *dome<sup>MESO</sup>-BFP*, *Hml<sup>A</sup>-DsRed*, *Hh-*  
351 *GFP/FM7* (U. Banerjee), *UAS-dsGFP* (II) (Brian McCabe), *UAS-FUCCI* (BL55722), *UAS-2xEGFP* (U.  
352 Banerjee), *dome<sup>MESO</sup>-GAL4* (U. Banerjee), *AuroraB-RNAi* (BL28691), *UAS-iTRACE* (BL66387), *UAS-*  
353 *GTRACE<sup>LTO</sup>* (U. Banerjee), *dome<sup>MESO</sup>-BFP*, *Hml<sup>A</sup>-DsRed*, *Hh-GFP*, *UAS-hid*, *rpr/FM7* (U. Banerjee),  
354 *UAS-hid*, *rpr* (U. Banerjee), *CHIZ-GAL4*, *UAS-mGFP*; *Hml<sup>A</sup>-DsRed* (U. Banerjee), *UAS-Raf<sup>ACT</sup>*  
355 (BL2033), *UAS-Ras<sup>V12</sup>* (U. Banerjee), *UAS-Ras<sup>DN</sup>* (U. Banerjee), *UAS-Ras85d-RNAi* (BL29319), *UAS-*  
356 *pnt-RNAi* (BL31936), *UAS-Yan<sup>ACT</sup>* (BL5789), *UAS-Yan<sup>WT</sup>* (BL5790), *Lz-GAL4*, *UAS-mGFP* (U.  
357 Banerjee), *UAS-Yan-RNAi* (BL34909), *UAS-Yan-RNAi* (BL35404), and *Ser-RNAi* (U. Banerjee). All  
358 stocks were maintained at room temperature or 18°C. All genetic crosses, with the exclusion of  
359 the staged larval time course experiment described below, were raised at 29°C for maximum  
360 GAL4-UAS efficiency. All flies were raised on standard *Drosophila* fly food with a recipe  
361 containing dextrose, corn meal, and yeast.

362

### 363 **Development of *CHIZ-GAL4* driver**

364 The *dome*<sup>MESO</sup> enhancer (*dM*-Forward primer: 5'-CACCCGTCTACCGCGATTCCAAGCACATCCG-3';  
365 *dM*-Reverse primer: 5'-GGATCCAAAATACCCGATGTAAAATCG-3'), *Hml*<sup>A</sup> enhancer (*Hml*<sup>A</sup>-Forward  
366 primer: 5'-CACCGGTACCCAAAAGTTATTTCTG-3', and *Hml*<sup>A</sup>-Reverse primer: 5'-  
367 GTTTAATTGTATACACAGGAAAATC-3') were amplified from *Drosophila* genomic DNA and ligated  
368 into the pENTR™/D-TOPO™ vector (Invitrogen: Cat#K240020) for Gateway cloning. Each entry  
369 vector was ligated into the pBPp65ADZpUw (Addgene 26234) and pBPZpGAL4DBDUw (Addgene  
370 26233) destination vectors using the LR ligase (Invitrogen: Cat# 11791020) to generate the  
371 desired vectors (*dome*<sup>MESO</sup>-*p65-AD*, and *Hml*<sup>A</sup>-*pGAL4-DBD*). These vectors were sent to  
372 BestGene Inc for microinjection. Transgenic flies were generated by PhiC31 integrase-mediated  
373 site-specific transgenesis. The *Hml*<sup>A</sup>-*pGAL4-DBD* was integrated into the 51C locus of the  
374 *Drosophila* genome (Injection Stock: 24482NF), while the *dome*<sup>MESO</sup>-*p65-AD* was integrated into  
375 the 58A locus (Injection Stock: 24484NF). The transgenic *Drosophila* lines were crossed to  
376 generate *dome*<sup>MESO</sup>-*p65-AD*, *Hml*<sup>A</sup>-*pGAL4-DBD* stable lines through homologous recombination.

377

### 378 **Lymph gland dissection and immunohistochemistry**

379 Larval head complexes were dissected on a silicon dissecting dish in chilled 1xPBS. Head  
380 complexes including mouth hooks, eye-antennal discs, brain and ventral nerve cord, and lymph  
381 glands were immersed in fixation solution (4% formaldehyde in 1xPBS) for 25 minutes. After  
382 fixation, samples were washed three times for 10 minutes in lymph gland wash buffer (0.4%  
383 Triton in 1xPBS). Samples were incubated in 10%NGS in 1xPBS blocking solution for 10-30  
384 minutes then incubated in primary antibody overnight at 4°C. Samples were washed in lymph

385 gland wash buffer, then incubated in secondary antibody for 2-4 hours at room temperature.  
386 After washing off the secondary antibody in lymph gland wash buffer, ToPro dye (Invitrogen)  
387 was incorporated at a 1:1000 concentration for 7-10 minutes to visualize nuclei of tissues. After  
388 a final wash step, samples were immersed in Vectashield anti-fade mounting media, placed on  
389 a glass slide, and lymph glands were isolated from the head complexes and mounted. Samples  
390 were covered with a glass coverslip which was sealed with clear nail polish. Slides were stored  
391 at 4°C until imaged.

392  
393 Primary antibodies used in this study include rabbit $\alpha$ GFP (1:100), rat $\alpha$ Ecad (1:20, DSHB  
394 #DCAD2), rabbit $\alpha$ PH3 (1:1000, Cell Signaling #97015), mouse $\alpha$ P1 (1:100, Istvan Ando),  
395 mouse $\alpha$ Hnt (1:200, DSHB #1G9), mouse $\alpha$ Notch<sup>ICD</sup> (1:100, DSHB #C19.9C6), rat $\alpha$ Serrate (1:1000,  
396 Ken Irvine), mouse $\alpha$ Yan (1:100, DSHB #8B12H9), rabbit $\alpha$ dpERK (1:100, Cell Signaling #4370),  
397 and  $\alpha$ L1 (1:10, Istvan Ando). ToPro-3 (1:1000, Invitrogen). Secondary antibodies used in this  
398 study were purchased from Invitrogen and include: donkey $\alpha$ mouse AlexaFluor405,  
399 donkey $\alpha$ mouse AlexaFluor488, donkey $\alpha$ mouse AlexaFluor555, donkey $\alpha$ mouse Alexa-Fluor633,  
400 donkey $\alpha$ rabbit AlexaFluor488, donkey $\alpha$ rabbit AlexaFluor555, donkey $\alpha$ rat AlexaFluor555, and  
401 donkey $\alpha$ rat Cy3, and donkey $\alpha$ mouse Cy3 from Jackson Scientific. Secondary antibodies were  
402 used at a 1:100-1:2000 dilution dependent on the strength of the primary antibody.

403

#### 404 **Staged larval lymph gland dissections**

405 For data collected presented in Figure 4A-D, larvae were synchronized within an hour of each  
406 other in 12-hour phases. 100-200 mated flies (*CHIZ-GAL4* x *UAS-dsGFP*) were maintained in



407 collection chambers at 25°C and allowed to lay embryos on plates containing ethyl acetate (EA)  
408 media. After a 12-hour collection period, new EA plates were provided to the adults in  
409 collection chambers. The embryos on the old EA plates were incubated at 25°C for 24 hours.  
410 After this incubation time, hatched larvae were cleared from the plate using a paintbrush and  
411 the remaining unhatched embryos were incubated for 1 hour at 25°C. After 1 hour, newly  
412 hatched larvae were transferred with a paintbrush to a fresh vial of food. Five larvae were  
413 placed in each vial. Vials were incubated at 25°C until samples from all time points were  
414 dissected and processed for immunohistochemistry on the same day.

415

#### 416 **Microscopy and Image Processing**

417 All samples were imaged using a Zeiss LSM-880 confocal microscope using a Z-stack technique  
418 with 1.88µm slice thickness. Images were processed using ImageJ. Unless otherwise noted in  
419 the Figure Legends, images of lymph glands are a maximum intensity projection of the stack of  
420 the middle third of the samples.

421

#### 422 **Data Quantification**

423 All quantifications were performed using Imaris data analysis software by Bitplane to quantify  
424 Z-stacks of entire lymph glands. Briefly, lymph glands were contoured and fluorescent channels  
425 were masked to restrict quantifications to both primary lobes. To label and count nuclei, a spots  
426 filter was applied based on ToPro DNA dye incorporation. The DNA+ spots were then filtered  
427 against additional fluorescent channels to quantify specific cell types including *CHIZ>dsGFP+*,  
428 PH3+, or Hnt+. *FUCCI+* cells, *CHIZ+* PH3+ cells, and *CHIZ+* Yan+ cells were identified by positively

429 filtering for additional fluorophores. Percent of the lymph gland occupied by these particular  
430 cell types was determined by dividing the number of cells of interest by the total number of  
431 nuclei per lymph gland, then multiplying by 100. When quantifying the volume of the lymph  
432 gland and volume of P1+ fluorescence for data presented in Figure 2H, the surfaces filter was  
433 first applied based on ToPro DNA dye incorporation and then extended to fill in the volume of  
434 both primary lobes. A second volume measurement was made using the surfaces filter for P1+  
435 fluorescence. The percent of the lymph gland occupied by P1+ fluorescence was calculated by  
436 dividing the volume of P1+ fluorescence by the total lymph gland volume, then multiplying by  
437 100. All p-values presented represent unpaired student T-tests to determine statistical  
438 significance.

439

#### 440 **Flow cytometry**

441 *CHIZ-GAL4, UAS-FUCCI* lymph glands were dissected in 1XMDSS (Modified Dissecting Saline  
442 Solution: 9.9 mM HEPES-KOH, 137 mM NaCl, 5.4 mM KCL, 0.17 mM NaH<sub>2</sub>PO<sub>4</sub>, 0.22 mM KH<sub>2</sub>PO<sub>4</sub>,  
443 3.3 mM Glucose, 43.8 mM Sucrose, pH 7.4) and immediately submerged in Schneider's S2  
444 media in a glass watch glass on ice. Isolated lymph glands were washed once with 1XMDSS.  
445 1xMDSS was removed. 200uL of heat activated Papain solution (100 units/mL) was added to  
446 lymph glands which were then moved to an Eppendorf tube. Samples were covered in foil and  
447 incubated in Papain solution while shaking at 25° for 15 minutes. During incubation, tubes were  
448 removed twice to pipette up and down to break up tissue. Papain solution was inactivated by  
449 addition of 500uL cold S2 media. Tissue was centrifuged at 3000rpm for 5 minutes. Supernatant  
450 was removed and 1mL of 1% formaldehyde was added to the cell pellet. Cells were shaken in

451 fixative at 4° for 30 minutes. Cells were spun down at 3000rpm for 5 minutes and supernatant  
452 was removed. Cell nuclei were labeled by incubating pellet at room temperature for 30 minutes  
453 in NucBlue live cell stain Ready Probes Reagent (Invitrogen, Hoechst33342 Special Formulation).  
454 Sample was transferred to a round-bottom polystyrene tube and samples were run through a  
455 BD LSRII FACS analyzer. Gates for cell fluorescence were standardized using single  
456 fluorophore controls. This experiment was replicated five times using 50-85 lymph glands per  
457 round.  
458

459 **Figure Legends**

460

461 **Figure 1:** Characterization of intermediate zone cell population. **(A)** Computer rendering of a  
462 confocal image of a lymph gland (*dome<sup>MESO</sup>-GFPnls, Hml<sup>A</sup>-DsRednls*). Nuclei have been pseudo-  
463 colored based on endogenous fluorescence. Progenitors in the MZ are labeled by *dome<sup>MESO</sup>-*  
464 *GFP*, and pseudo-colored blue. Differentiated cells in the CZ are labeled by *Hml<sup>A</sup>-DsRed* and are  
465 pseudo-colored magenta. IZ cells identified by an overlap in expression of both *dome<sup>MESO</sup>-GFP*  
466 and *Hml<sup>A</sup>-DsRed* are pseudo-colored green. **(B)** Model depicting the split-*GAL4* components  
467 used to create *CHIZ-GAL4*. Shown in blue is the expression of a P65 activation domain (AD) in  
468 *dome<sup>MESO</sup>+* cells. Shown in magenta is the DNA binding domain (DBD) of *GAL4* which is  
469 expressed in *Hml+* cells. Only the intermediate zone cells with overlapping expression of the AD  
470 and DBD express GFP shown in green. **(C-E)** A third instar lymph gland with fluorescently  
471 labeled zones (*dome<sup>MESO</sup>-BFP, Hml<sup>A</sup>-DsRed; CHIZ-GAL4, UAS-mGFP*) shows *CHIZ-GAL4*  
472 expression (green) juxtaposed between the MZ (*dome+*, blue) and CZ (*Hml+*, magenta). For  
473 clarify, for the same lymph gland shown in **C**, the magenta *Hml* channel is omitted in **D**, and the  
474 blue *dome* channel is omitted in **E**. **(F-H)** Developmental progression of *CHIZ-GAL4* expression  
475 (*CHIZ-GAL4, UAS-mGFP*). **(F)** The first appearance of *CHIZ-GAL4* is observed at the distal edge of  
476 the mid-second instar lymph gland. **(G)** During early third instar, *CHIZ-GAL4* expression appears  
477 in more cells, but with cells at the periphery lacking *CHIZ-GAL4* expression. **(H)** In wandering  
478 third instar larvae, *CHIZ-GAL4* expression is dispersed throughout the lymph gland. GFP+ cells  
479 seen outside of the dashed line belong to the paired primary lobe. **(I)** Intermediate zone  
480 marked with nuclearly localized destabilized GFP. **(J)** E-cadherin protein (magenta) present on  
481 the progenitor cell membranes ceases its expression within the IZ cells (green). **(K)** IZ cells

482 (green) directly abut E-cadherin positive cells (magenta). **(L)** Pie chart representing the average  
483 percent of *CHIZ-GAL4* expressing cells in primary LG lobes that are in G1 (green), S phase (red),  
484 and G2/early M phase (yellow) as assessed by the expression of the *Fly FUCCI* indicator. M  
485 phase cannot be separately assessed using *Fly FUCCI*. **(M)** Lack of co-localization of *CHIZ* cells  
486 (green) with mitotic marker phospho-histone H3 (magenta). **(N)** Data from *CHIZ>dsGFP* lymph  
487 glands stained with PH3 show lack of overlap between IPs and PH3+ cells. Images in **C-E, J, K**  
488 and **M** are a single slice of a Z-stack image. Images in **F-I** are a maximum intensity projection of  
489 the middle third of the lymph gland of a Z-stack. White dashed lines indicate the edges of lymph  
490 gland primary lobe in **A, C-I** as discerned from nuclear staining (not shown).

491

492 **Figure 1—figure supplement 1: (A)** IPs can be in G1 (green), S (red), or G2 (yellow) phases of  
493 the cell cycle (*CHIZ-GAL4; UAS-FUCCI*). **(B)** Flow cytometric analysis of IPs indicates the majority  
494 of IPs are distributed equally between S (red) and G2 (yellow) with a smaller percent of cells in  
495 G1 (green) (*CHIZ-GAL4; UAS-FUCCI*). **(C)** Extended perdurance of strong and long-lived  
496 fluorophores such as eGFP (green) do not properly represent the specificity of *CHIZ-GAL4*  
497 expression. Such fluorophores perdure into the CZ region and fail to follow the transitory  
498 nature of the IPs (*CHIZ-GAL4; UAS-2xeGFP*). **(D-G)** Nuclear size-based assay for M-phase cells **(D)**  
499 Nuclei of progenitors marked by a cell cycle indicator (*dome<sup>MESO</sup>-GAL4, UAS-FUCCI*). **(E)** *dome+*  
500 nuclei attempting to enter M-phase at the edge of the MZ become enlarged in size when  
501 mitosis is blocked by loss of *AuroraB* (red arrowheads) (*dome<sup>MESO</sup>-GAL4; UAS-FUCCI, UAS-*  
502 *AuroraB-RNAi*). **(F)** Nuclei of IP cells marked by a cell cycle indicator (*CHIZ-GAL4; UAS-FUCCI*).  
503 **(G)** Due to lack of M-phase cells, nuclear size of IPs is not affected upon loss of *AuroraB* (*CHIZ-*

504 *GAL4; UAS-FUCCI, UAS-AuroraB-RNAi*). White dashed lines indicate the edges of lymph gland  
505 primary lobe in **A**, and **C**.  
506  
507 **Figure 2:** IP cells contribute to all mature hemocyte populations. **(A)** *CHIZ* cells (green) do not  
508 co-localize with mature plasmatocytes which stain for P1 (magenta). Instead, *CHIZ* cells are  
509 often seen neighboring P1-expressing cells. **(B)** *CHIZ* cells (green) do not stain for Hnt  
510 (magenta), a marker for crystal cells. **(C)** A control primary lobe without any GAL4 driver. *dome+*  
511 MZ cells (cyan) and *Hml+* CZ cells (magenta) (*dome<sup>MESO</sup>-BFP, Hml<sup>A</sup>-DsRed, UAS-hid,rpr*). **(D)**  
512 Apoptosis induced in the IP population leads to a severe decrease in the *Hml+* (magenta)  
513 population compared with *dome+* (cyan) (*dome<sup>MESO</sup>-BFP, Hml<sup>A</sup>-DsRed; CHIZ-GAL4, UAS-hid,rpr*).  
514 **(E)** Quantitation of data shown in **C, D**. **(F)** Control showing non-overlap of *CHIZ* cells (green)  
515 and P1-expressing cells (magenta) (*CHIZ>mGFP*). **(G)** Genetic ablation of IP cells (green) leads to  
516 a reduction in P1-expressing cells (magenta). Also, dying *CHIZ* cells are evident as GFP puncta  
517 (green, also seen in **J**) (*CHIZ>mGFP, UAS-hid,rpr*). **(H)** Quantitation of data shown in **F, G**. **(I)**  
518 Control number of Hnt-expressing crystal cells (*CHIZ>mGFP*). **(J)** IP ablation leads to a reduction  
519 in crystal cell number (Hnt+, magenta) (*CHIZ>mGFP, UAS-hid,rpr*). **(K)** Quantitation of data  
520 shown in **I, J**. **(L)** *CHIZ* cell descendants (identified by the lack of GFP expression (cyan)) are  
521 observed to have P1 antibody staining (magenta). Live expression of *CHIZ-GAL4* is visualized in  
522 yellow (*CHIZ-GAL4; UAS-iTRACE*). **(M)** Crystal cells marked by Hnt antibody staining (magenta)  
523 can co-localize (white, due to overlap of green and magenta) with cells lineage traced from the  
524 *CHIZ* population (green) (*CHIZ-GAL4, UAS-GTRACE<sup>LTO</sup>*). **(N)** 24 hours post-injury, cells lineage  
525 traced from the *CHIZ* population (green) can be seen expressing L1 (magenta) present in

526 mature lamellocytes (*CHIZ-GAL4; UAS-GTRACEL<sup>TO</sup>*). **A** and **B** are single slices from a Z-stack, **L** is a  
527 maximum projection stack of 10 slices, **M** and **N** are maximum projection of 3 slices, and **C, D, F,**  
528 **G, I,** and **J** are stacks of the middle third of confocal data. White dashed lines indicate the edges  
529 of lymph gland primary lobe in **F, G, I,** and **J**.

530

531 **Figure 3:** Ras/Raf activity facilitates the IP to hemocyte transition. Images of lymph glands **A-E**  
532 and **G-L** are maximum projections of the middle third of a Z-stack. **(A-E)** *CHIZ*<sup>+</sup> IZ cells are  
533 marked with a nuclear fluorescent marker for quantification purposes (*CHIZ-GAL4, UAS-FUCCI,*  
534 *UAS-X* where X is defined for each panel). **(A)** Control number of IZ cells. **(B)** *UAS-Raf<sup>ACT</sup>* leads to  
535 a loss of IZ cells. **(C)** *UAS-Ras<sup>V12</sup>* causes a similar decrease in IZ cells as **B**. **(D)** An increase in IZ  
536 cells is apparent when *CHIZ-GAL4* drives *UAS-Ras<sup>DN</sup>*. **(E)** Increased IZ cells are present when  
537 expressing *UAS-Ras85D-RNAi* in IZ cells. **(F)** Fraction of *CHIZ*<sup>+</sup> cells in lymph glands represented  
538 in **A-E**. **(G-L)** *CHIZ*<sup>+</sup> IZ cells are marked in green and *Hml*<sup>+</sup> CZ cells are labeled in magenta (*CHIZ-*  
539 *GAL4, UAS-mGFP; Hml<sup>Δ</sup>-DsRed; UAS-X* where X is defined for each panel). **(G)** Wild type. **(H)**  
540 *UAS-Raf<sup>ACT</sup>* causes an extreme expansion of the CZ and loss of IZ. **(I)** *UAS-Ras<sup>DN</sup>* increases the  
541 proportion of IZ cells and leads to a decrease in CZ cells. **(J)** *UAS-pnt-RNAi* causes a large  
542 increase in proportion of IZ cells and very few CZ cells. **(K)** *UAS-Yan<sup>ACT</sup>* causes an increased IZ  
543 and reduced CZ. **(L)** *UAS-Yan<sup>WT</sup>* does not result in a shift in the general proportion of IZ to CZ as  
544 seen in **K**. **(M)** IZ cells (green) do not directly co-localize with nuclear Yan protein (magenta)  
545 (*CHIZ>dsGFP*). **(N)** Data from *CHIZ>dsGFP* lymph glands showing lack of any significant overlap  
546 between *CHIZ*<sup>+</sup> and Yan<sup>+</sup> cells. **(O)** Crystal cells (green) express nuclear Yan protein (magenta)

547 (*Lz-GAL4, UAS-mGFP*). (**P, Q**) A subset of IZ cells (green) show nuclear dpERK staining (magenta)  
548 (*CHIZ>mGFP*). Images **M, O, P** and **Q** are maximum projection stacks of three slices of a Z-stack.

549

550 **Figure 3—figure supplement 1: (A, A')** Control showing Yan staining (magenta) colocalized with  
551 crystal cells (blue) throughout the primary lobe. (**B-C'**) Expression of two separate *Yan-RNAi*  
552 constructs, BL34909 (**B,B'**) and BL35404 (**C,C'**) driven by *Lz-GAL4*. *Lz*+ crystal cells form (**B, C**),  
553 even though they are devoid of nuclear Yan accumulation (**B', C'**).

554

555 **Figure 4:** IP cells induce crystal cell formation mediated by the Notch pathway. (**A-D**) Genotype  
556 is *CHIZ-GAL4, UAS-dsGFP*. *CHIZ* cells are green (GFP) and crystal cells are magenta (Hnt). (**A**)  
557 Quantification of the raw number of *CHIZ* and crystal cells in lymph glands of developmentally  
558 synchronized larvae. The first significant appearance of *CHIZ* cells is at 72 hAEL (green arrow),  
559 while the first significant appearance of crystal cells is later, at 96hAEL (magenta arrow). (**B-I**) All  
560 images are single slices of confocal data. (**B**) Section from a 72hAEL primary lobe showing the  
561 first appearance of *CHIZ* cells. (**C**) At 96hAEL the earliest crystal cells (magenta arrow) are  
562 usually seen neighboring *CHIZ* cells (green arrow). (**D**) At 108hAEL wandering third instar,  
563 primary lobes have numerous crystal cells (magenta arrow) distant from *CHIZ* cells (green  
564 arrow). (**E-G**) Genotype is *CHIZ-GAL4, UAS-mGFP*. (**E**) *CHIZ* cells (green) do not co-localize with  
565 high levels of N<sup>ICD</sup> protein (magenta) observed in neighboring cells. (**F, G**) *CHIZ* cells (green) co-  
566 localize with high levels of Serrate protein (magenta) in early third instar. (**H**) Control showing  
567 Serrate protein expression (magenta) in early third instar lymph gland. (**I**) Serrate protein  
568 (magenta) is absent in early third instar when *Ser-RNAi* is driven by *CHIZ-GAL4* (*CHIZ-GAL4, UAS-*



569 *Ser-RNAi*). **(J)** The number of crystal cells (Hnt+) per lymph gland decreases when *Ser-RNAi* is  
570 expressed in IP cells (*CHIZ-GAL4, UAS-Ser-RNAi*) compared to control (*CHIZ-GAL4*). White  
571 dashed lines indicate the edges of lymph gland primary lobe in **F-I**.

572

573 **Figure 4—figure supplement 1: (A, B)** Control wandering late third instar lymph gland shows  
574 Serrate staining is virtually absent (magenta) and this no longer correlates with *CHIZ* cells  
575 (green). Images are a maximum projection of the middle third of a confocal Z-stack.

576 **References**

577

578 Adams, R.R., Maiato, H., Earnshaw, W.C., and Carmena, M. (2001). Essential roles of *Drosophila*  
579 inner centromere protein (INCENP) and aurora B in histone H3 phosphorylation, metaphase  
580 chromosome alignment, kinetochore disjunction, and chromosome segregation. *J Cell Biol*  
581 *153*, 865-880.

582 Benmimoun, B., Polesello, C., Haenlin, M., and Waltzer, L. (2015). The EBF transcription factor  
583 Collier directly promotes *Drosophila* blood cell progenitor maintenance independently of  
584 the niche. *Proc Natl Acad Sci U S A* *112*, 9052-9057.

585 Bosch, J.A., Sumabat, T.M., and Hariharan, I.K. (2016). Persistence of RNAi-Mediated  
586 Knockdown in *Drosophila* Complicates Mosaic Analysis Yet Enables Highly Sensitive Lineage  
587 Tracing. *Genetics* *203*, 109-118.

588 Brunner, D., Ducker, K., Oellers, N., Hafen, E., Scholz, H., and Klambt, C. (1994). The ETS domain  
589 protein pointed-P2 is a target of MAP kinase in the sevenless signal transduction pathway.  
590 *Nature* *370*, 386-389.

591 Bryant, K.L., Mancias, J.D., Kimmelman, A.C., and Der, C.J. (2014). KRAS: feeding pancreatic  
592 cancer proliferation. *Trends Biochem Sci* *39*, 91-100.

593 Cho, B., Spratford, C.M., Yoon, S., Cha, N., Banerjee, U., and Shim, J. (2018). Systemic control of  
594 immune cell development by integrated carbon dioxide and hypoxia chemosensation in  
595 *Drosophila*. *Nat Commun* *9*, 2679.

596 Cho, B., Yoon, S.H., Lee, D., Koranteng, F., Tattikota, S.G., Cha, N., Shin, M., Do, H., Hu, Y., Oh,  
597 S.Y., *et al.* (2020). Single-cell transcriptome maps of myeloid blood cell lineages in  
598 *Drosophila*. *Nat Commun* *11*, 4483.

599 Coffman, R.L., and Weissman, I.L. (1981). B220: a B cell-specific member of the T200 glycoprotein  
600 family. *Nature* *289*, 681-683.

601 Crozatier, M., Ubeda, J.M., Vincent, A., and Meister, M. (2004). Cellular immune response to  
602 parasitization in *Drosophila* requires the EBF orthologue collier. *PLoS Biol* *2*, E196.

603 Dey, N.S., Ramesh, P., Chugh, M., Mandal, S., and Mandal, L. (2016). Dpp dependent  
604 Hematopoietic stem cells give rise to Hh dependent blood progenitors in larval lymph gland  
605 of *Drosophila*. *Elife* *5*.

- 606 Dragojlovic-Munther, M., and Martinez-Agosto, J.A. (2013). Extracellular matrix-modulated  
607 Heartless signaling in *Drosophila* blood progenitors regulates their differentiation via a  
608 Ras/ETS/FOG pathway and target of rapamycin function. *Dev Biol* 384, 313-330.
- 609 Dzierzak, E., and Speck, N.A. (2008). Of lineage and legacy: the development of mammalian  
610 hematopoietic stem cells. *Nat Immunol* 9, 129-136.
- 611 Evans, C.J., Hartenstein, V., and Banerjee, U. (2003). Thicker than blood: conserved mechanisms  
612 in *Drosophila* and vertebrate hematopoiesis. *Dev Cell* 5, 673-690.
- 613 Evans, C.J., Olson, J.M., Ngo, K.T., Kim, E., Lee, N.E., Kuoy, E., Patananan, A.N., Sitz, D., Tran, P.,  
614 Do, M.T., *et al.* (2009). G-TRACE: rapid Gal4-based cell lineage analysis in *Drosophila*. *Nat*  
615 *Methods* 6, 603-605.
- 616 Flores, G.V., Duan, H., Yan, H., Nagaraj, R., Fu, W., Zou, Y., Noll, M., and Banerjee, U. (2000).  
617 Combinatorial signaling in the specification of unique cell fates. *Cell* 103, 75-85.
- 618 Freeman, M. (1996). Reiterative use of the EGF receptor triggers differentiation of all cell types  
619 in the *Drosophila* eye. *Cell* 87, 651-660.
- 620 Gao, H., Wu, X., and Fossett, N. (2013). *Drosophila* E-cadherin functions in hematopoietic  
621 progenitors to maintain multipotency and block differentiation. *PLoS One* 8, e74684.
- 622 Gao, H., Wu, X., Simon, L., and Fossett, N. (2014). Antioxidants maintain E-cadherin levels to  
623 limit *Drosophila* prohemocyte differentiation. *PLoS One* 9, e107768.
- 624 Ghosh, S., Singh, A., Mandal, S., and Mandal, L. (2015). Active hematopoietic hubs in *Drosophila*  
625 adults generate hemocytes and contribute to immune response. *Dev Cell* 33, 478-488.
- 626 Giet, R., and Glover, D.M. (2001). *Drosophila* aurora B kinase is required for histone H3  
627 phosphorylation and condensin recruitment during chromosome condensation and to  
628 organize the central spindle during cytokinesis. *J Cell Biol* 152, 669-682.
- 629 Grether, M.E., Abrams, J.M., Agapite, J., White, K., and Steller, H. (1995). The head involution  
630 defective gene of *Drosophila melanogaster* functions in programmed cell death. *Genes Dev*  
631 9, 1694-1708.
- 632 Grigorian, M., Mandal, L., and Hartenstein, V. (2011). Hematopoiesis at the onset of  
633 metamorphosis: terminal differentiation and dissociation of the *Drosophila* lymph gland.  
634 *Dev Genes Evol* 221, 121-131.

- 635 Hao, Y., and Jin, L.H. (2017). Dual role for Jumu in the control of hematopoietic progenitors in  
636 the *Drosophila* lymph gland. *Elife* 6.
- 637 Hernandez, P.P., Strzelecka, P.M., Athanasiadis, E.I., Hall, D., Robalo, A.F., Collins, C.M.,  
638 Boudinot, P., Levraud, J.P., and Cvejic, A. (2018). Single-cell transcriptional analysis reveals  
639 ILC-like cells in zebrafish. *Sci Immunol* 3.
- 640 Honti, V., Kurucz, E., Csordas, G., Laurinyecz, B., Markus, R., and Ando, I. (2009). In vivo  
641 detection of lamellocytes in *Drosophila melanogaster*. *Immunol Lett* 126, 83-84.
- 642 Ikuta, K., and Weissman, I.L. (1992). Evidence that hematopoietic stem cells express mouse c-kit  
643 but do not depend on steel factor for their generation. *Proc Natl Acad Sci U S A* 89, 1502-  
644 1506.
- 645 Irving, P., Ubeda, J.M., Doucet, D., Troxler, L., Lagueux, M., Zachary, D., Hoffmann, J.A., Hetru,  
646 C., and Meister, M. (2005). New insights into *Drosophila* larval haemocyte functions through  
647 genome-wide analysis. *Cell Microbiol* 7, 335-350.
- 648 Jenett, A., Rubin, G.M., Ngo, T.T., Shepherd, D., Murphy, C., Dionne, H., Pfeiffer, B.D., Cavallaro,  
649 A., Hall, D., Jeter, J., *et al.* (2012). A GAL4-driver line resource for *Drosophila* neurobiology.  
650 *Cell Rep* 2, 991-1001.
- 651 Jung, S.H., Evans, C.J., Uemura, C., and Banerjee, U. (2005). The *Drosophila* lymph gland as a  
652 developmental model of hematopoiesis. *Development* 132, 2521-2533.
- 653 Karnoub, A.E., and Weinberg, R.A. (2008). Ras oncogenes: split personalities. *Nat Rev Mol Cell*  
654 *Biol* 9, 517-531.
- 655 Krzemien, J., Dubois, L., Makki, R., Meister, M., Vincent, A., and Crozatier, M. (2007). Control of  
656 blood cell homeostasis in *Drosophila* larvae by the posterior signalling centre. *Nature* 446,  
657 325-328.
- 658 Krzemien, J., Oyallon, J., Crozatier, M., and Vincent, A. (2010). Hematopoietic progenitors and  
659 hemocyte lineages in the *Drosophila* lymph gland. *Dev Biol* 346, 310-319.
- 660 Kurucz, E., Markus, R., Zsamboki, J., Folkl-Medzihradzky, K., Darula, Z., Vilmos, P., Udvardy, A.,  
661 Krausz, I., Lukacsovich, T., Gateff, E., *et al.* (2007). Nimrod, a putative phagocytosis receptor  
662 with EGF repeats in *Drosophila* plasmatocytes. *Curr Biol* 17, 649-654.

- 663 Kurucz, E., Zettervall, C.J., Sinka, R., Vilmos, P., Pivarcsi, A., Ekengren, S., Hegedus, Z., Ando, I.,  
664 and Hultmark, D. (2003). Hemese, a hemocyte-specific transmembrane protein, affects the  
665 cellular immune response in *Drosophila*. *Proc Natl Acad Sci U S A* *100*, 2622-2627.
- 666 Lai, Z.C., and Rubin, G.M. (1992). Negative control of photoreceptor development in *Drosophila*  
667 by the product of the *yan* gene, an ETS domain protein. *Cell* *70*, 609-620.
- 668 Lanot, R., Zachary, D., Holder, F., and Meister, M. (2001). Postembryonic hematopoiesis in  
669 *Drosophila*. *Dev Biol* *230*, 243-257.
- 670 Lebestky, T., Chang, T., Hartenstein, V., and Banerjee, U. (2000). Specification of *Drosophila*  
671 hematopoietic lineage by conserved transcription factors. *Science* *288*, 146-149.
- 672 Lebestky, T., Jung, S.H., and Banerjee, U. (2003). A Serrate-expressing signaling center controls  
673 *Drosophila* hematopoiesis. *Genes Dev* *17*, 348-353.
- 674 Leitao, A.B., and Sucena, E. (2015). *Drosophila* sessile hemocyte clusters are true hematopoietic  
675 tissues that regulate larval blood cell differentiation. *Elife* *4*.
- 676 Li, X., Zhao, X., Fang, Y., Jiang, X., Duong, T., Fan, C., Huang, C.C., and Kain, S.R. (1998).  
677 Generation of destabilized green fluorescent protein as a transcription reporter. *J Biol Chem*  
678 *273*, 34970-34975.
- 679 Lu, S., Jang, H., Gu, S., Zhang, J., and Nussinov, R. (2016). Drugging Ras GTPase: a  
680 comprehensive mechanistic and signaling structural view. *Chem Soc Rev* *45*, 4929-4952.
- 681 Mandal, L., Banerjee, U., and Hartenstein, V. (2004). Evidence for a fruit fly hemangioblast and  
682 similarities between lymph-gland hematopoiesis in fruit fly and mammal aorta-gonadal-  
683 mesonephros mesoderm. *Nat Genet* *36*, 1019-1023.
- 684 Mandal, L., Martinez-Agosto, J.A., Evans, C.J., Hartenstein, V., and Banerjee, U. (2007). A  
685 Hedgehog- and Antennapedia-dependent niche maintains *Drosophila* haematopoietic  
686 precursors. *Nature* *446*, 320-324.
- 687 Markus, R., Kurucz, E., Rus, F., and Ando, I. (2005). Sterile wounding is a minimal and sufficient  
688 trigger for a cellular immune response in *Drosophila melanogaster*. *Immunol Lett* *101*, 108-  
689 111.

- 690 Markus, R., Laurinyecz, B., Kurucz, E., Honti, V., Bajusz, I., Sipos, B., Somogyi, K., Kronhamn, J.,  
691 Hultmark, D., and Ando, I. (2009). Sessile hemocytes as a hematopoietic compartment in  
692 *Drosophila melanogaster*. *Proc Natl Acad Sci U S A* *106*, 4805-4809.
- 693 Minakhina, S., and Steward, R. (2010). Hematopoietic stem cells in *Drosophila*. *Development*  
694 *137*, 27-31.
- 695 Mondal, B.C., Mukherjee, T., Mandal, L., Evans, C.J., Sinenko, S.A., Martinez-Agosto, J.A., and  
696 Banerjee, U. (2011). Interaction between differentiating cell- and niche-derived signals in  
697 hematopoietic progenitor maintenance. *Cell* *147*, 1589-1600.
- 698 Mondal, B.C., Shim, J., Evans, C.J., and Banerjee, U. (2014). Pvr expression regulators in  
699 equilibrium signal control and maintenance of *Drosophila* blood progenitors. *Elife* *3*,  
700 e03626.
- 701 Morrison, S.J., and Weissman, I.L. (1994). The long-term repopulating subset of hematopoietic  
702 stem cells is deterministic and isolatable by phenotype. *Immunity* *1*, 661-673.
- 703 Mukherjee, T., Kim, W.S., Mandal, L., and Banerjee, U. (2011). Interaction between Notch and  
704 Hif-alpha in development and survival of *Drosophila* blood cells. *Science* *332*, 1210-1213.
- 705 Muller-Sieburg, C.E., Whitlock, C.A., and Weissman, I.L. (1986). Isolation of two early B  
706 lymphocyte progenitors from mouse marrow: a committed pre-pre-B cell and a clonogenic  
707 Thy-1-lo hematopoietic stem cell. *Cell* *44*, 653-662.
- 708 Nagaraj, R., and Banerjee, U. (2007). Combinatorial signaling in the specification of primary  
709 pigment cells in the *Drosophila* eye. *Development* *134*, 825-831.
- 710 Neyen, C., Binggeli, O., Roversi, P., Bertin, L., Sleiman, M.B., and Lemaitre, B. (2015). The Black  
711 cells phenotype is caused by a point mutation in the *Drosophila* pro-phenoloxidase 1 gene  
712 that triggers melanization and hematopoietic defects. *Dev Comp Immunol* *50*, 166-174.
- 713 Nusslein-Volhard, C., Wieschaus, E., and Kluding, H. (1984). Mutations affecting the pattern of  
714 the larval cuticle in *Drosophila melanogaster* : I. Zygotic loci on the second chromosome.  
715 *Wilehm Roux Arch Dev Biol* *193*, 267-282.
- 716 O'Neill, E.M., Rebay, I., Tjian, R., and Rubin, G.M. (1994). The activities of two Ets-related  
717 transcription factors required for *Drosophila* eye development are modulated by the  
718 Ras/MAPK pathway. *Cell* *78*, 137-147.

- 719 Owusu-Ansah, E., and Banerjee, U. (2009). Reactive oxygen species prime *Drosophila*  
720 haematopoietic progenitors for differentiation. *Nature* *461*, 537-541.
- 721 Oyallon, J., Vanzo, N., Krzemien, J., Morin-Poulard, I., Vincent, A., and Crozatier, M. (2016). Two  
722 Independent Functions of Collier/Early B Cell Factor in the Control of *Drosophila* Blood Cell  
723 Homeostasis. *PLoS One* *11*, e0148978.
- 724 Papalexi, E., and Satija, R. (2018). Single-cell RNA sequencing to explore immune cell  
725 heterogeneity. *Nat Rev Immunol* *18*, 35-45.
- 726 Pastor-Pareja, J.C., Wu, M., and Xu, T. (2008). An innate immune response of blood cells to  
727 tumors and tissue damage in *Drosophila*. *Dis Model Mech* *1*, 144-154; discussion 153.
- 728 Pfeiffer, B.D., Jenett, A., Hammonds, A.S., Ngo, T.T., Misra, S., Murphy, C., Scully, A., Carlson,  
729 J.W., Wan, K.H., Laverty, T.R., *et al.* (2008). Tools for neuroanatomy and neurogenetics in  
730 *Drosophila*. *Proc Natl Acad Sci U S A* *105*, 9715-9720.
- 731 Pfeiffer, B.D., Ngo, T.T., Hibbard, K.L., Murphy, C., Jenett, A., Truman, J.W., and Rubin, G.M.  
732 (2010). Refinement of tools for targeted gene expression in *Drosophila*. *Genetics* *186*, 735-  
733 755.
- 734 Rebay, I., and Rubin, G.M. (1995). Yan functions as a general inhibitor of differentiation and is  
735 negatively regulated by activation of the Ras1/MAPK pathway. *Cell* *81*, 857-866.
- 736 Rizki, R.M., and Rizki, T.M. (1979). Cell interactions in the differentiation of a melanotic tumor in  
737 *Drosophila*. *Differentiation* *12*, 167-178.
- 738 Rizki, R.M., and Rizki, T.M. (1991). Effects of lamelolysin from a parasitoid wasp on *Drosophila*  
739 blood cells in vitro. *J Exp Zool* *257*, 236-244.
- 740 Rizki, T.M., and Rizki, R.M. (1992). Lamellocyte differentiation in *Drosophila* larvae parasitized  
741 by *Leptopilina*. *Dev Comp Immunol* *16*, 103-110.
- 742 Sharma, S.K., Ghosh, S., Geetha, A.R., Mandal, S., and Mandal, L. (2019). Cell Adhesion-  
743 Mediated Actomyosin Assembly Regulates the Activity of *Cubitus Interruptus* for  
744 Hematopoietic Progenitor Maintenance in *Drosophila*. *Genetics* *212*, 1279-1300.
- 745 Shim, J., Mukherjee, T., and Banerjee, U. (2012). Direct sensing of systemic and nutritional  
746 signals by haematopoietic progenitors in *Drosophila*. *Nat Cell Biol* *14*, 394-400.

- 747 Shim, J., Mukherjee, T., Mondal, B.C., Liu, T., Young, G.C., Wijewarnasuriya, D.P., and Banerjee,  
748 U. (2013). Olfactory control of blood progenitor maintenance. *Cell* *155*, 1141-1153.
- 749 Simon, M.A., Bowtell, D.D., Dodson, G.S., Laverty, T.R., and Rubin, G.M. (1991). Ras1 and a  
750 putative guanine nucleotide exchange factor perform crucial steps in signaling by the  
751 sevenless protein tyrosine kinase. *Cell* *67*, 701-716.
- 752 Sinenko, S.A., Mandal, L., Martinez-Agosto, J.A., and Banerjee, U. (2009). Dual role of wingless  
753 signaling in stem-like hematopoietic precursor maintenance in *Drosophila*. *Dev Cell* *16*, 756-  
754 763.
- 755 Small, C., Ramroop, J., Otazo, M., Huang, L.H., Saleque, S., and Govind, S. (2014). An unexpected  
756 link between notch signaling and ROS in restricting the differentiation of hematopoietic  
757 progenitors in *Drosophila*. *Genetics* *197*, 471-483.
- 758 Smith, L.G., Weissman, I.L., and Heimfeld, S. (1991). Clonal analysis of hematopoietic stem-cell  
759 differentiation in vivo. *Proc Natl Acad Sci U S A* *88*, 2788-2792.
- 760 Sorrentino, R.P., Carton, Y., and Govind, S. (2002). Cellular immune response to parasite  
761 infection in the *Drosophila* lymph gland is developmentally regulated. *Dev Biol* *243*, 65-80.
- 762 Stofanko, M., Kwon, S.Y., and Badenhorst, P. (2008). A misexpression screen to identify  
763 regulators of *Drosophila* larval hemocyte development. *Genetics* *180*, 253-267.
- 764 Tepass, U., Fessler, L.I., Aziz, A., and Hartenstein, V. (1994). Embryonic origin of hemocytes and  
765 their relationship to cell death in *Drosophila*. *Development* *120*, 1829-1837.
- 766 Terriente-Felix, A., Li, J., Collins, S., Mulligan, A., Reekie, I., Bernard, F., Krejci, A., and Bray, S.  
767 (2013). Notch cooperates with Lozenge/Runx to lock haemocytes into a differentiation  
768 programme. *Development* *140*, 926-937.
- 769 Tokusumi, T., Tokusumi, Y., Hopkins, D.W., Shoue, D.A., Corona, L., and Schulz, R.A. (2011).  
770 Germ line differentiation factor Bag of Marbles is a regulator of hematopoietic progenitor  
771 maintenance during *Drosophila* hematopoiesis. *Development* *138*, 3879-3884.
- 772 Uchida, N., and Weissman, I.L. (1992). Searching for hematopoietic stem cells: evidence that  
773 Thy-1.1<sup>lo</sup> Lin<sup>-</sup> Sca-1<sup>+</sup> cells are the only stem cells in C57BL/Ka-Thy-1.1 bone marrow. *J Exp*  
774 *Med* *175*, 175-184.



775 Villani, A.C., Satija, R., Reynolds, G., Sarkizova, S., Shekhar, K., Fletcher, J., Griesbeck, M., Butler,  
776 A., Zheng, S., Lazo, S., *et al.* (2017). Single-cell RNA-seq reveals new types of human blood  
777 dendritic cells, monocytes, and progenitors. *Science* 356.

778 Wang, J., Beck, E.S., McCabe, B.D. (2012). A Modular Toolset for Recombination Transgenesis  
779 and Neurogenic analysis in *Drosophila*. *PLoS ONE* 7, e42102

780 Weissman, I.L., and Shizuru, J.A. (2008). The origins of the identification and isolation of  
781 hematopoietic stem cells, and their capability to induce donor-specific transplantation  
782 tolerance and treat autoimmune diseases. *Blood* 112, 3543-3553.

783 White, K., Grether, M.E., Abrams, J.M., Young, L., Farrell, K., and Steller, H. (1994). Genetic  
784 control of programmed cell death in *Drosophila*. *Science* 264, 677-683.

785 Zeng, A., Li, H., Guo, L., Gao, X., McKinney, S., Wang, Y., Yu, Z., Park, J., Semerad, C., Ross, E., *et*  
786 *al.* (2018). Prospectively Isolated Tetraspanin(+) Neoblasts Are Adult Pluripotent Stem Cells  
787 Underlying Planaria Regeneration. *Cell* 173, 1593-1608 e1520.

788 Zielke, N., Kim, K.J., Tran, V., Shibutani, S.T., Bravo, M.J., Nagarajan, S., van Straaten, M.,  
789 Woods, B., von Dassow, G., Rottig, C., *et al.* (2011). Control of *Drosophila* endocycles by E2F  
790 and CRL4(CDT2). *Nature* 480, 123-127.

791

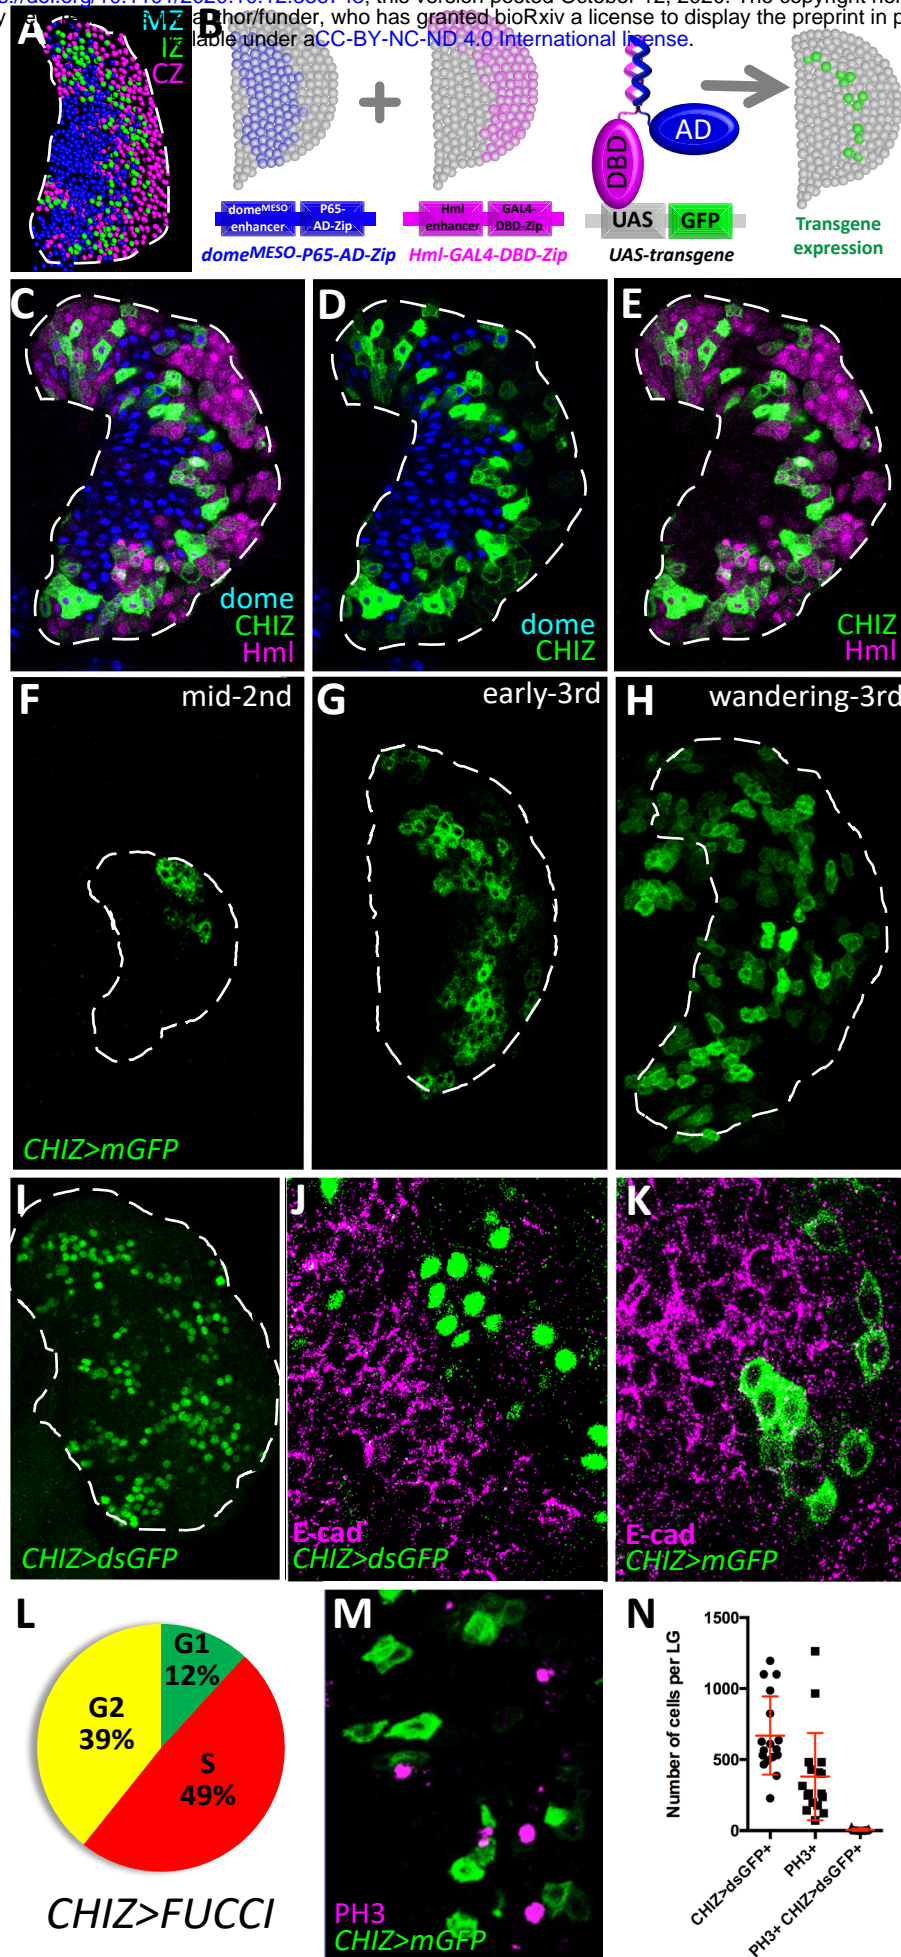

Figure 1, Figure Supplement 1

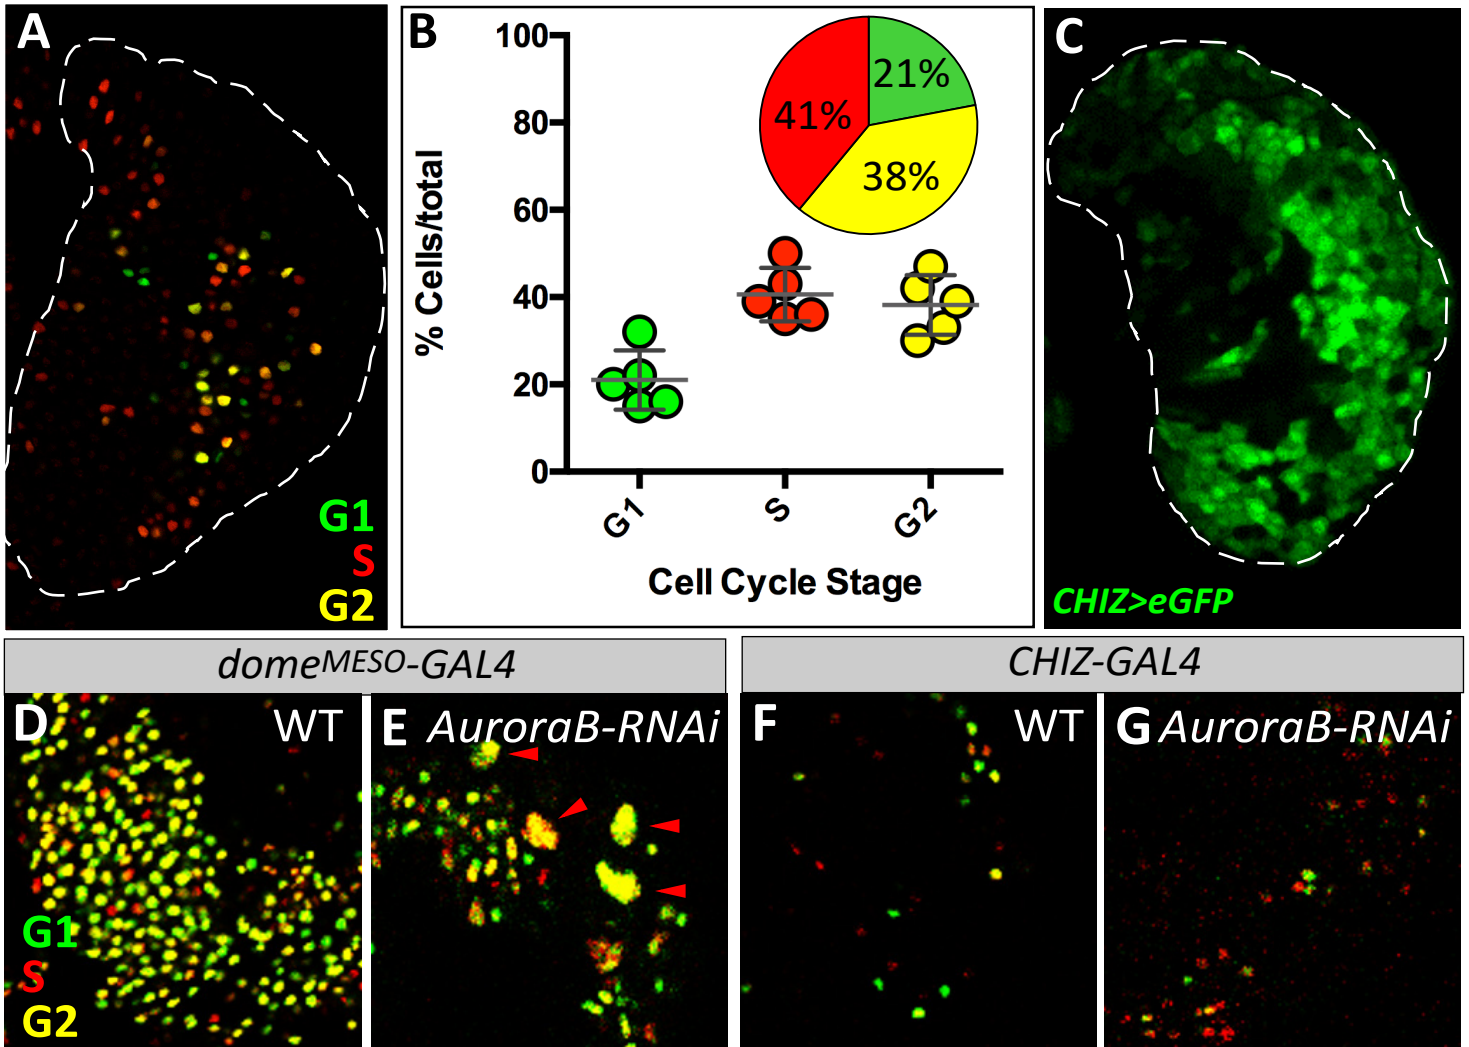



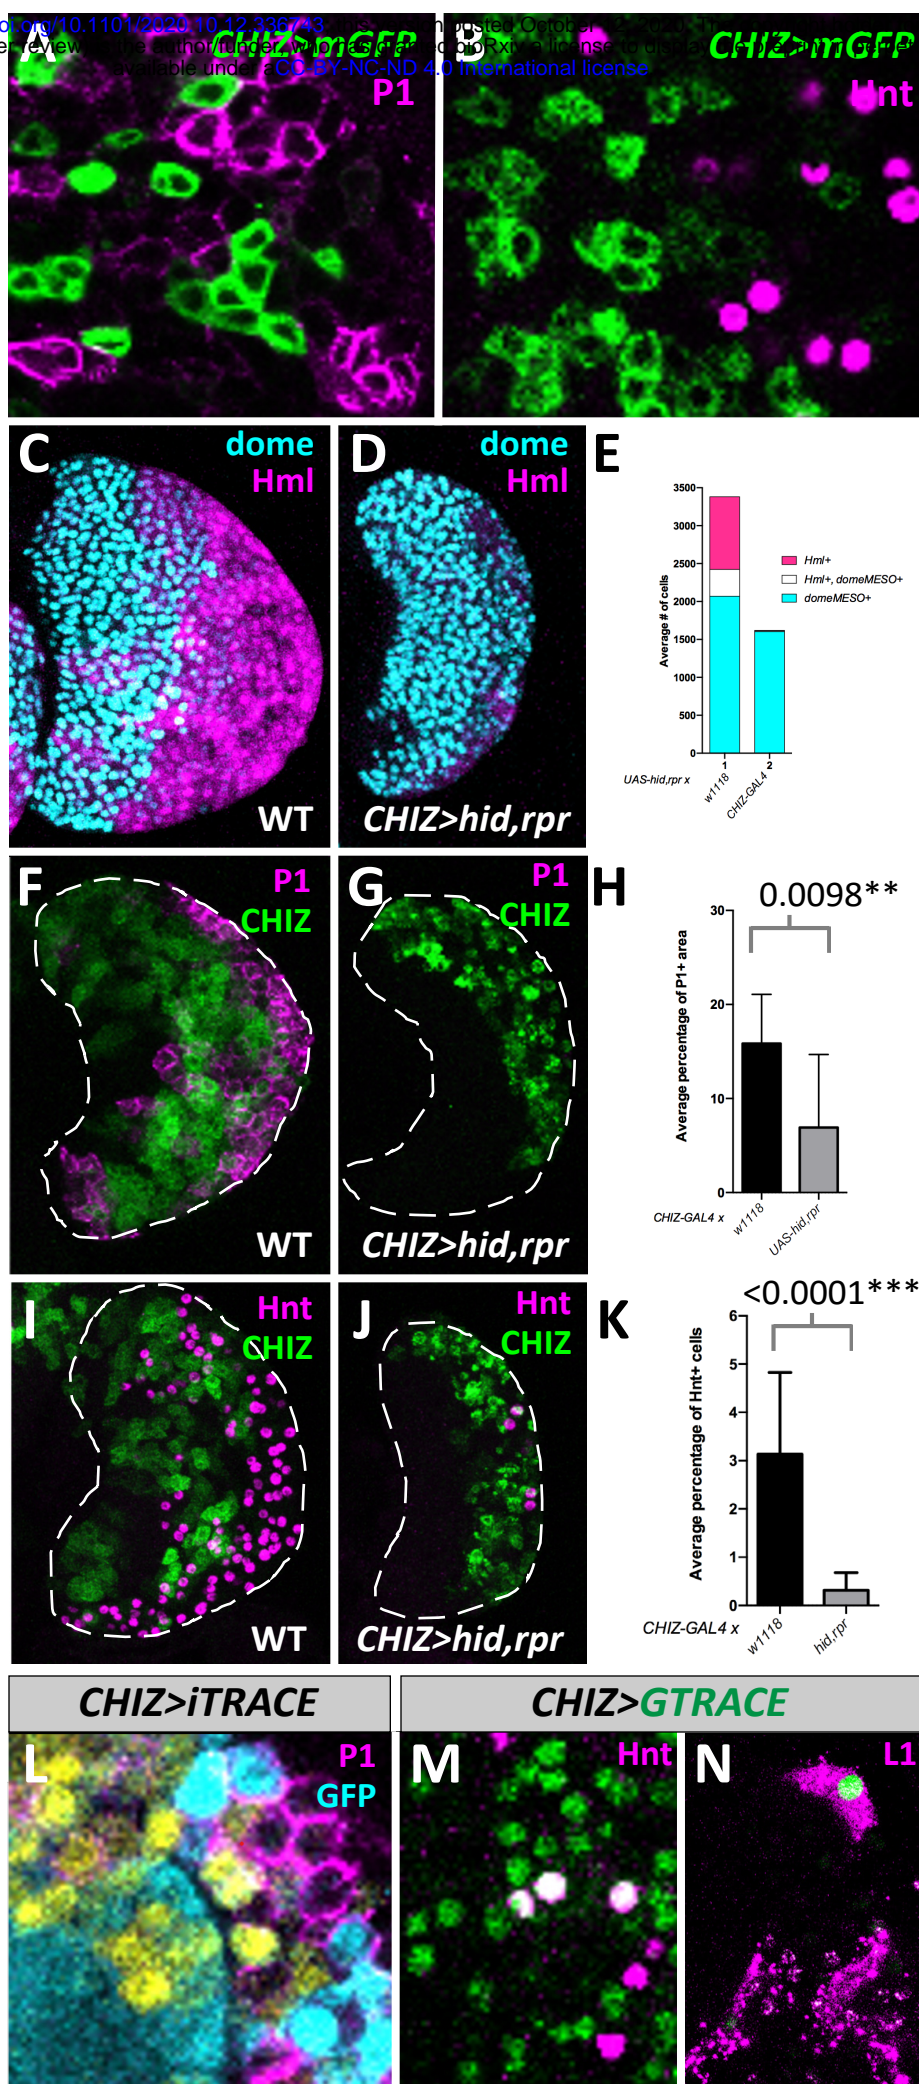

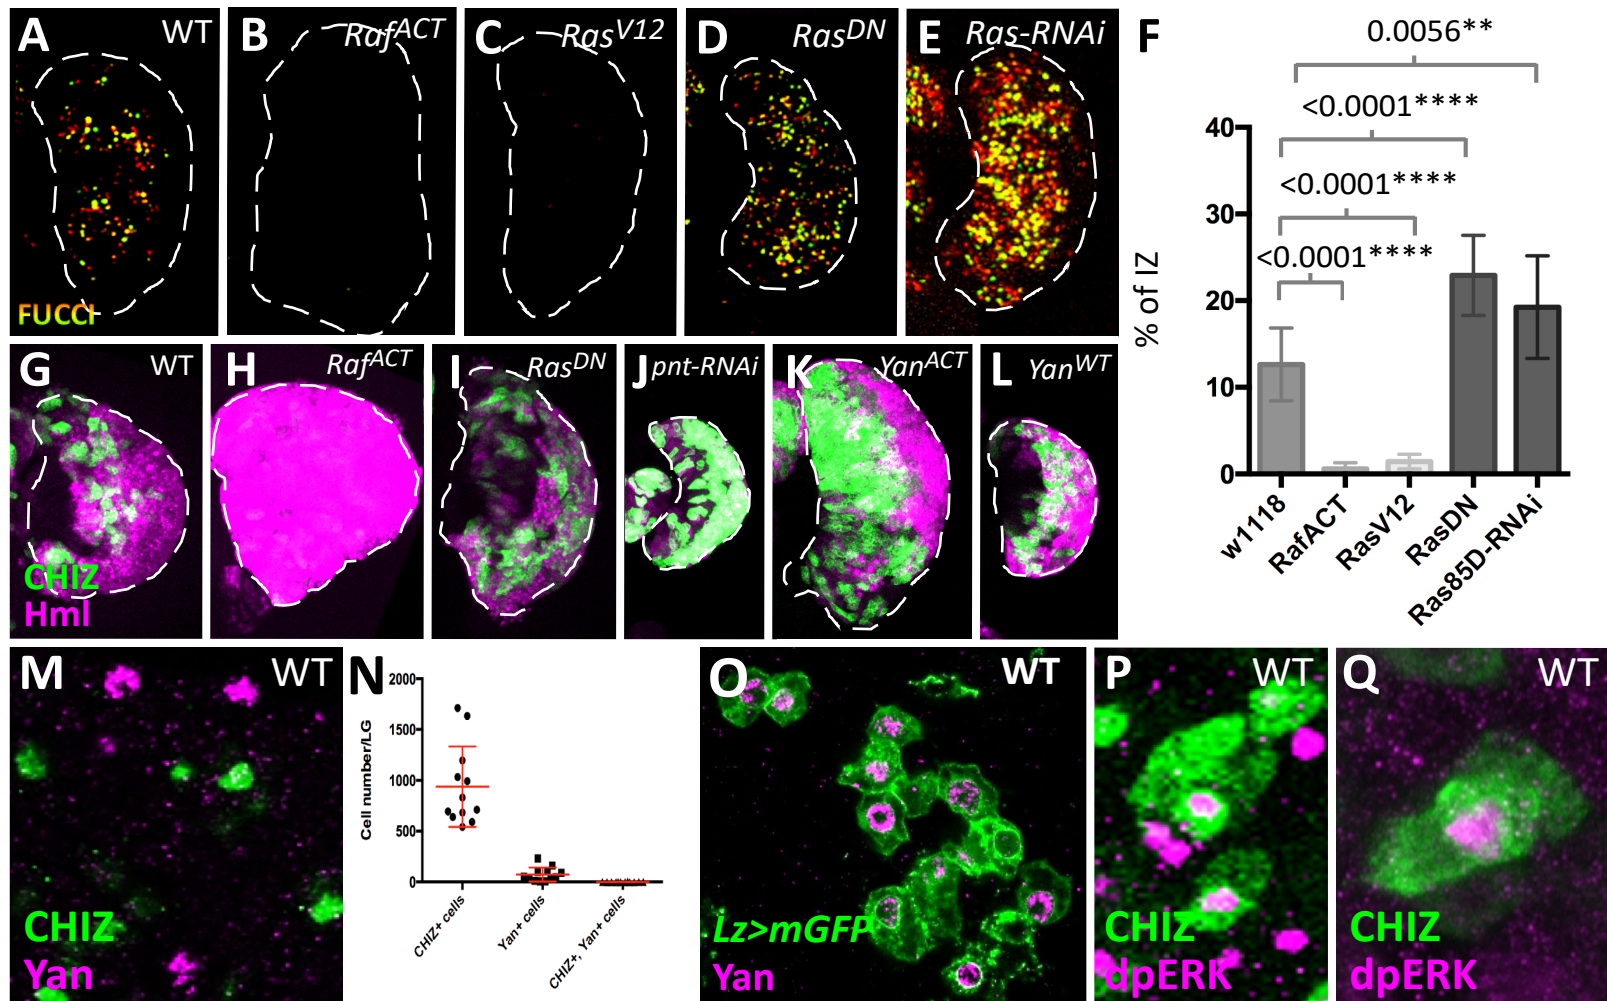



**Figure 3--figure supplement 1**

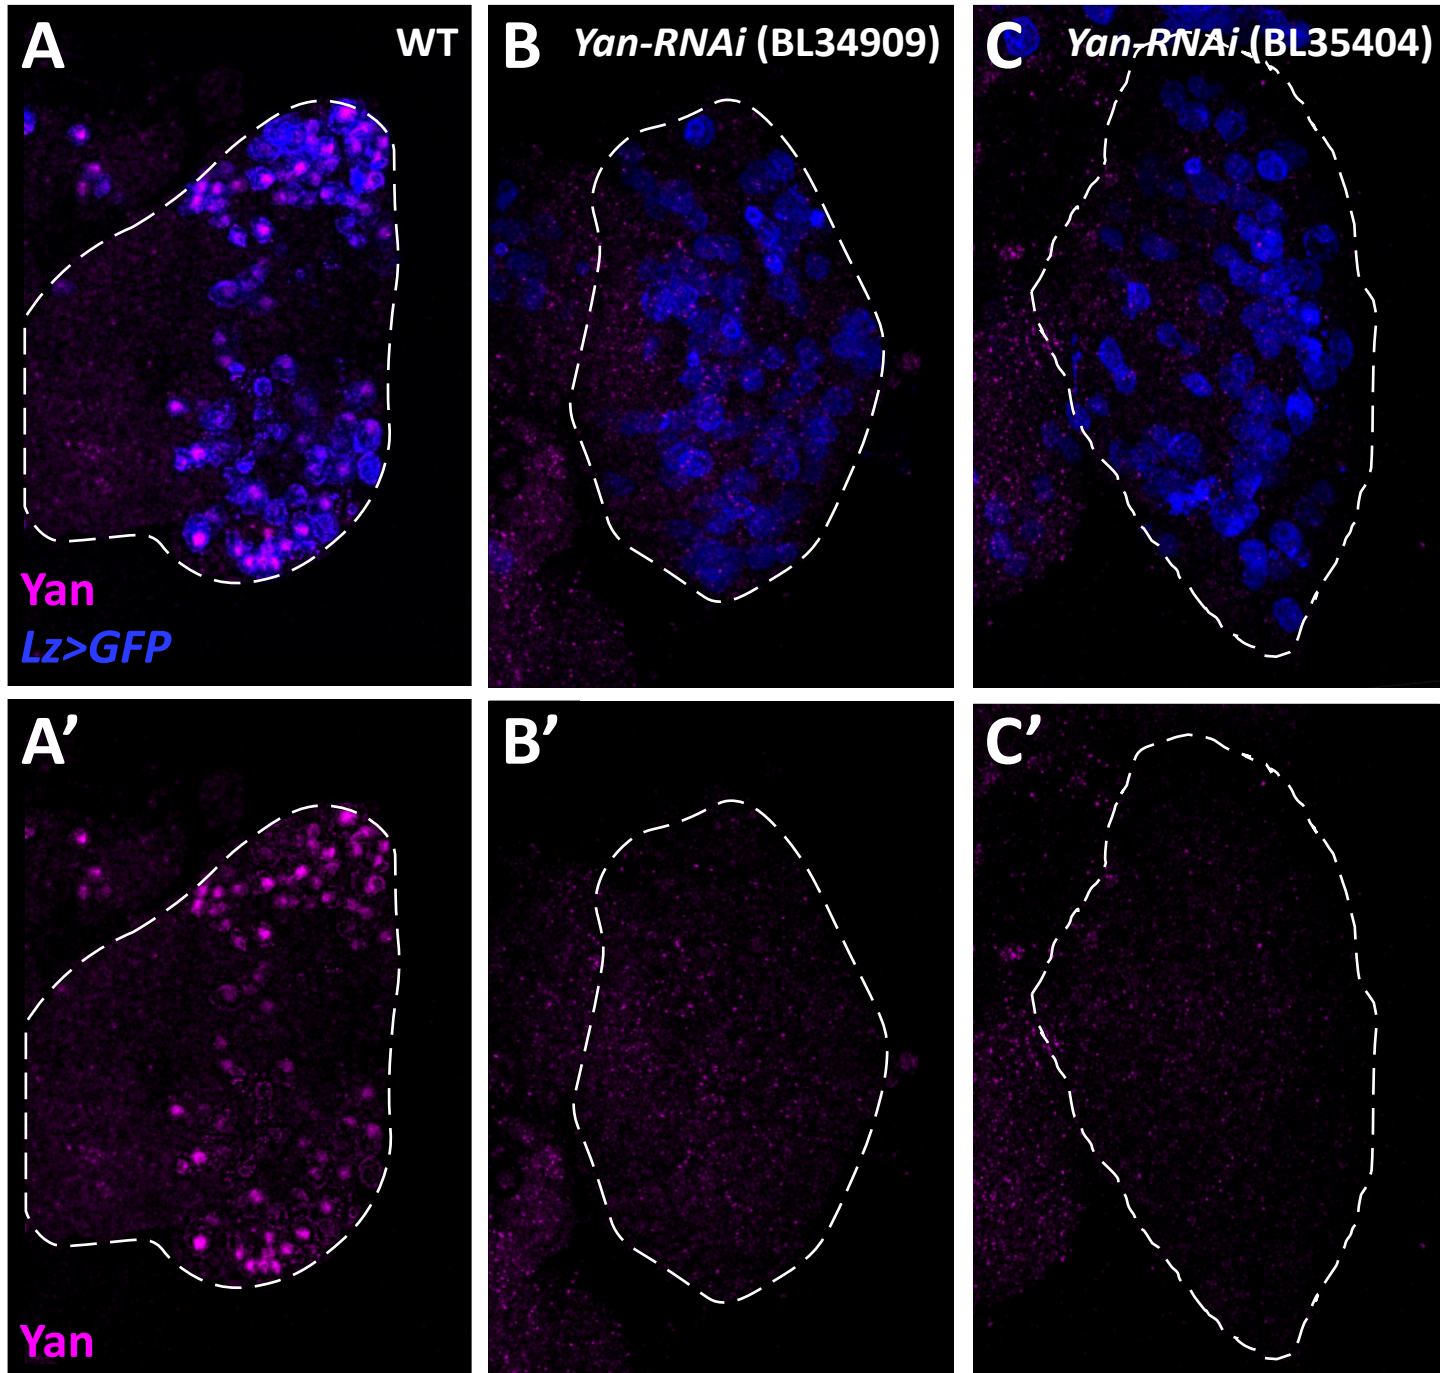

**Figure 4**

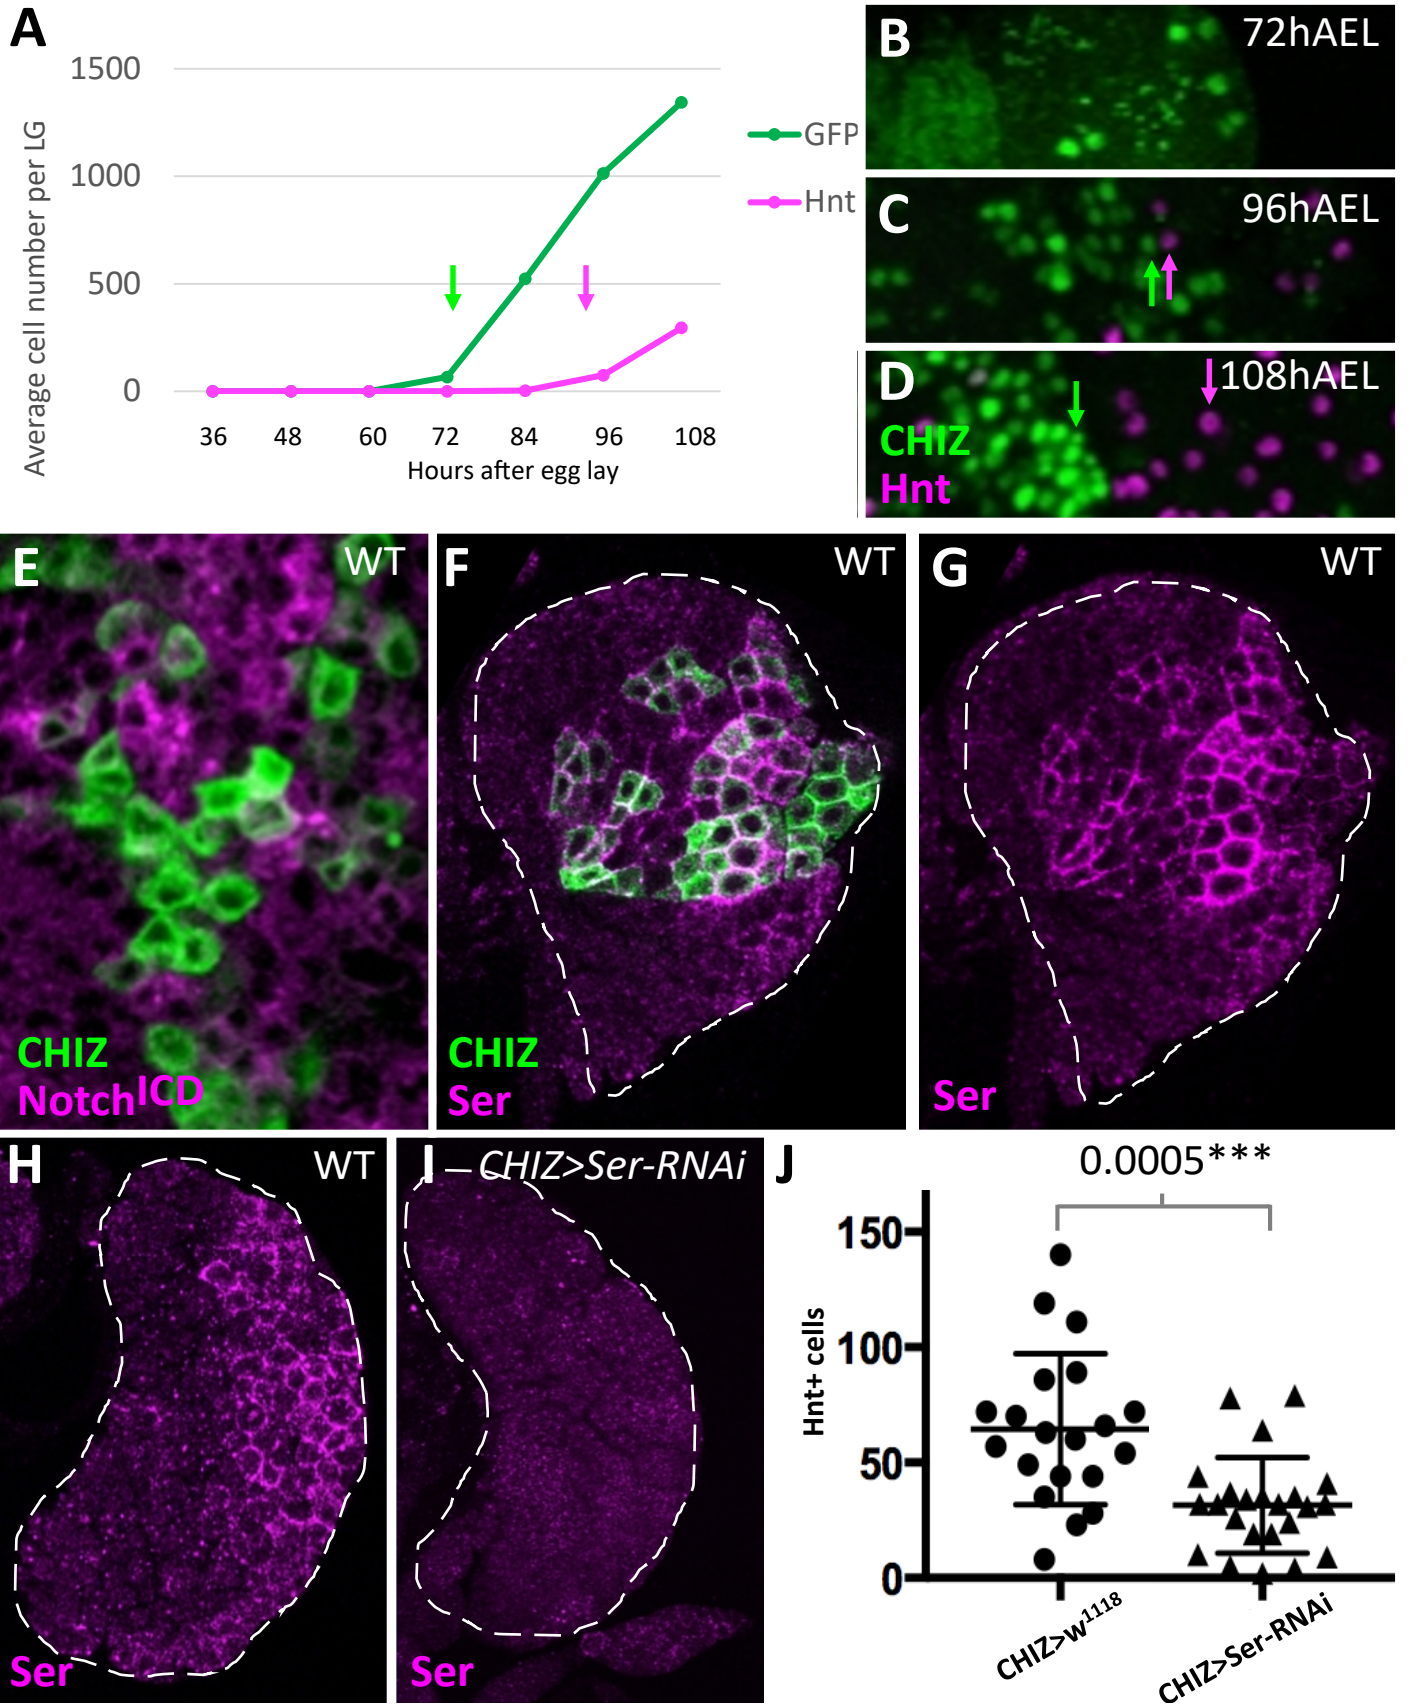



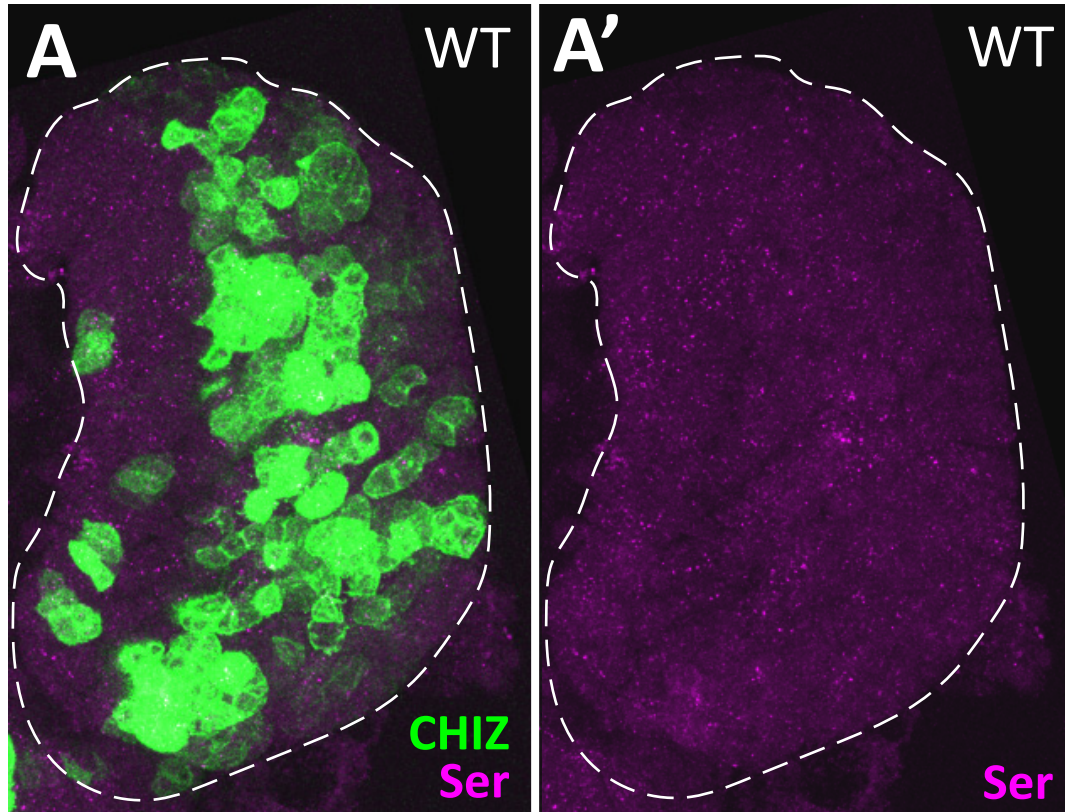

Source: https://www.biorxiv.org/content/10.1101/2020.10.12.336743v1.full.pdf
